# Supplementary material for: Polygenic association with severity and long-term outcome in eating disorder cases
Source: Research Square preprint supplement (doi:10.21203/rs.3.rs-724835/v1), 2021-10-07
Supplement: Supplementary file 3 [file b1172eb4adcb4e5217214f5e.xlsx]

## Sheet: Title sheet
Polygenic association and long-term outcome in eating disorder cases
Therese Johansson, Andreas Birgegård, Ruyue Zhang, Sarah Bergen, Mikael Landén, Liselotte Vogdrup Petersen, Cynthia M. Bulik, Christopher Hübel
Supplementary Tables
ST S1 Linear regression of clinical severity (total Clinical Impairment Assessment score) on anorexia nervosa polygenic score (PGS)
ST S2 Linear regression of clinical severity (total Clinical Impairment Assessment score) on schizophrenia polygenic score (PGS)
ST S3 Linear regression of clinical severity (total Clinical Impairment Assessment score) on body mass index polygenic score (PGS)
ST S4 Logisitic regression of severe and eduring eating disorder on anorexia nervosa polygenic score (PGS)
ST S5 Logisitic regression of severe and eduring eating disorder on schizophrenia polygenic score (PGS)
ST S6 Logisitic regression of severe and eduring eating disorder on body mass index polygenic score (PGS)
ST S7 Linear regression of clinical severity (total Clinical Impairment Assessment score) on polygenic scores (PGSs) caulcated by PRS-CS
ST S8 Logisitic regression of severe and eduring eating disorder on polygenic scores (PGSs) calcualted by PRS-CS

## Sheet: ST 1 AN PGS linear severity
Supplementary Table 1. Beta estimates of anorexia nervosa polygenic score (PGS) on disorder severity in either the full anorexia nervosa (AN) with other lifetime eating disorders (ED, mixed presentation), only anorexia nervosa [AN], or only anorexia nervosa restricting subtype (ANR) sample. Polygenic scores (PGSs) were generated from SNPs associated with lifetime anorexia nervosa (AN) at p-value …
Model 1: Principal components 1-10, treatment region. Model 2: Same as model 1 and age. Model 3: Same as model 2 and sex. Model 4: (main model): Same as model 3, eating disorder diagnosis and follow-up time (defined as years between first treatment registration and ANGI recruitment). Model 5: Same as model 4 and BMI. Model 6: Same as model 4 and age at eating disorder onset.
Additional eating disorder diagnosis to anorexia nervosa (AN) was only included in the model when analysing the full dataset (N = 2,843).
N: Number of individuals included in each model, note that in model 5 and 6 fewer individuals are included due to missing data on body mass index (BMI) and age at eating disorder onset.
		Full sample with mixed eating disorder (ED) presentation							Sample with anorexia nervosa (AN) diagnosis							Sample with anorexia nervosa restricting (ANR) subtype							Sample with low-weight (BMI ≤ 17.5) anorexia nervosa
AN PGS P-value threshold from the discovery dataset	Models	N	Beta	95%CI low	CI95% up	SE	P-value		N	Beta	95%CI low	CI95% up	SE	P-value		N	Beta	95%CI low	CI95% up	SE	P-value		N	Beta	95%CI low	CI95% up	SE	P-value
Pt <5e08	Model 1	2843	-0.0255738	-0.507397	0.456249	0.245727	0.917118		1839	0.27181	-0.319675	0.863295	0.301583	0.36756		976	0.20996	-0.585323	1.00524	0.405252	0.604511		1241	0.382418	-0.363274	1.12811	0.380086	0.314549
	Model 2	2843	-0.0208521	-0.500486	0.458782	0.244611	0.932072		1839	0.276405	-0.312721	0.865532	0.30038	0.357598		976	0.179698	-0.610764	0.970161	0.402795	0.655605		1241	0.410055	-0.330516	1.15063	0.377476	0.277556
	Model 3	2843	-0.0168974	-0.495978	0.462183	0.244328	0.944868		1839	0.272775	-0.314525	0.860074	0.299449	0.362457		976	0.172627	-0.6172	0.962453	0.402471	0.66808		1241	0.41522	-0.323939	1.15438	0.376756	0.270638
	Model 4	2843	-0.0117592	-0.479497	0.455979	0.238544	0.960687		1839	0.306268	-0.268915	0.881452	0.293271	0.296477		976	0.183542	-0.591316	0.9584	0.394843	0.642146		1241	0.42258	-0.302186	1.14735	0.369419	0.252887
	Model 5	2828	0.0190852	-0.448775	0.486945	0.238605	0.936254		1829	0.345424	-0.232486	0.923334	0.29466	0.241239		963	0.254321	-0.52643	1.03507	0.397838	0.522812		1241	0.418153	-0.307146	1.14345	0.36969	0.25824
	Model 6	2688	0.0324714	-0.44214	0.507083	0.242043	0.89329		1756	0.291193	-0.295643	0.87803	0.299203	0.330574		931	0.0559719	-0.734932	0.846876	0.402994	0.889568		1173	0.367267	-0.380766	1.1153	0.381256	0.335595
Pt <1e05	Model 1	2843	0.251933	-0.230351	0.734217	0.245962	0.305794		1839	0.598905	0.00491645	1.19289	0.30286	0.0481356		976	0.534887	-0.257457	1.32723	0.403755	0.185559		1241	0.717895	-0.0257034	1.46149	0.379019	0.0584489
	Model 2	2843	0.225509	-0.254702	0.705721	0.244905	0.357232		1839	0.579815	-0.0119191	1.17155	0.30171	0.0547916		976	0.48799	-0.299883	1.27586	0.401476	0.224479		1241	0.689233	-0.0493903	1.42786	0.376483	0.0673861
	Model 3	2843	0.223123	-0.256529	0.702775	0.24462	0.361784		1839	0.556408	-0.0336755	1.14649	0.300869	0.0645707		976	0.466837	-0.320829	1.2545	0.40137	0.245075		1241	0.683065	-0.0541803	1.42031	0.37578	0.0693508
	Model 4	2843	0.172667	-0.295969	0.641304	0.239002	0.470077		1839	0.589062	0.0112053	1.16692	0.294634	0.0457244		976	0.506334	-0.266389	1.27906	0.393755	0.198785		1241	0.71961	-0.00322406	1.44244	0.368434	0.051029
	Model 5	2828	0.195639	-0.272438	0.663717	0.238716	0.412544		1829	0.608277	0.0292927	1.18726	0.295207	0.0394932		963	0.554607	-0.222365	1.33158	0.395913	0.161594		1241	0.718894	-0.00418336	1.44197	0.368558	0.0513382
	Model 6	2688	0.197734	-0.276666	0.672135	0.241935	0.413829		1756	0.553653	-0.0315222	1.13883	0.298356	0.0636688		931	0.392187	-0.389104	1.17348	0.398096	0.324808		1173	0.620203	-0.116901	1.35731	0.375685	0.0990403
Pt <0.001	Model 1	2843	0.322212	-0.16051	0.804934	0.246186	0.190702		1839	0.485543	-0.118698	1.08978	0.308087	0.115201		976	0.789694	-0.0479132	1.6273	0.42682	0.0645945		1241	0.47426	-0.277115	1.22563	0.382983	0.21583
	Model 2	2843	0.332491	-0.148039	0.813021	0.245068	0.174976		1839	0.477758	-0.124097	1.07961	0.306871	0.119675		976	0.800641	-0.0316394	1.63292	0.424105	0.0593494		1241	0.494749	-0.251418	1.24092	0.380328	0.193556
	Model 3	2843	0.348513	-0.13157	0.828595	0.244839	0.154721		1839	0.499291	-0.10077	1.09935	0.305956	0.102872		976	0.810719	-0.0208787	1.64232	0.423756	0.0560238		1241	0.544494	-0.201196	1.29018	0.380085	0.152239
	Model 4	2843	0.342948	-0.125938	0.811833	0.239129	0.151639		1839	0.574229	-0.0135134	1.16197	0.299675	0.0554994		976	0.93169	0.115556	1.74782	0.415876	0.04		1241	0.605434	-0.12578	1.33665	0.372705	0.104542
	Model 5	2828	0.326477	-0.142506	0.795461	0.239178	0.172364		1829	0.538753	-0.0512996	1.12881	0.300851	0.0734987		963	0.879382	0.0562861	1.70248	0.419415	0.0362874		1241	0.604876	-0.12658	1.33633	0.372829	0.104977
	Model 6	2688	0.34254	-0.135098	0.820178	0.243586	0.159771		1756	0.479161	-0.11907	1.07739	0.305013	0.116376		931	0.852763	0.0245174	1.68101	0.422021	0.0436064		1173	0.463441	-0.287295	1.21418	0.382634	0.226072
Pt <0.01	Model 1	2843	-0.259815	-0.742509	0.222879	0.246172	0.291322		1839	-0.273483	-0.881719	0.334754	0.310125	0.377975		976	0.0185941	-0.803984	0.841173	0.419162	0.964626		1241	-0.0390041	-0.794012	0.716004	0.384835	0.919287
	Model 2	2843	-0.285025	-0.765596	0.195546	0.245089	0.24495		1839	-0.316095	-0.922225	0.290036	0.309051	0.306542		976	-0.0305917	-0.848409	0.787226	0.416735	0.941497		1241	-0.0958313	-0.846034	0.654371	0.382385	0.802154
	Model 3	2843	-0.281803	-0.761818	0.198212	0.244805	0.249776		1839	-0.322116	-0.926363	0.28213	0.30809	0.295918		976	-0.049714	-0.867137	0.767709	0.416533	0.905022		1241	-0.100876	-0.849657	0.647904	0.38166	0.791586
	Model 4	2843	-0.282458	-0.751825	0.186909	0.239374	0.238107		1839	-0.23457	-0.826742	0.357602	0.301933	0.437322		976	0.0635278	-0.739207	0.866263	0.409048	0.876613		1241	-0.0768133	-0.811078	0.657452	0.374261	0.837419
	Model 5	2828	-0.250408	-0.720226	0.219409	0.239604	0.29607		1829	-0.210602	-0.805574	0.384371	0.303359	0.487626		963	0.108372	-0.701498	0.918242	0.412676	0.79291		1241	-0.0805904	-0.815268	0.654087	0.374471	0.829639
	Model 6	2688	-0.324752	-0.800383	0.150879	0.242563	0.180739		1756	-0.365476	-0.964351	0.233399	0.305341	0.231492		931	-0.029325	-0.837042	0.778392	0.41156	0.943212		1173	-0.26865	-1.01423	0.476931	0.380006	0.479733
Pt <0.05	Model 1	2843	-0.27947	-0.762794	0.203855	0.246493	0.256982		1839	-0.33251	-0.935373	0.270354	0.307385	0.279513		976	-0.123718	-0.937741	0.690305	0.414802	0.765571		1241	-0.0236264	-0.770962	0.72371	0.380924	0.950554
	Model 2	2843	-0.281672	-0.762796	0.199451	0.245371	0.251088		1839	-0.343689	-0.944161	0.256783	0.306165	0.261772		976	-0.0762948	-0.885611	0.733021	0.412403	0.853268		1241	-0.0261942	-0.768341	0.715952	0.378279	0.944805
	Model 3	2843	-0.283121	-0.76368	0.197438	0.245083	0.248104		1839	-0.337477	-0.936097	0.261143	0.305221	0.269011		976	-0.0817781	-0.890414	0.726858	0.412056	0.842724		1241	-0.0291752	-0.76991	0.711559	0.377559	0.938419
	Model 4	2843	-0.295498	-0.765391	0.174394	0.239643	0.217649		1839	-0.270155	-0.856674	0.316364	0.299051	0.366447		976	-0.0389798	-0.832425	0.754466	0.404315	0.923215		1241	-0.0699209	-0.796336	0.656494	0.37026	0.850247
	Model 5	2828	-0.258592	-0.728215	0.211031	0.239505	0.28037		1829	-0.235111	-0.823186	0.352964	0.299842	0.433076		963	-0.00310295	-0.80039	0.794184	0.406264	0.993908		1241	-0.0715668	-0.798252	0.655118	0.370397	0.846822
	Model 6	2688	-0.343196	-0.819838	0.133446	0.243079	0.158105		1756	-0.389301	-0.983762	0.20516	0.30309	0.19916		931	-0.132155	-0.932483	0.668173	0.407796	0.745958		1173	-0.218695	-0.958073	0.520682	0.376844	0.561803
Pt <0.1	Model 1	2843	-0.211397	-0.69568	0.272886	0.246982	0.392114		1839	-0.323471	-0.926966	0.280023	0.307707	0.293291		976	-0.300505	-1.12437	0.523358	0.419816	0.474288		1241	-0.0138774	-0.7654	0.737646	0.383058	0.971107
	Model 2	2843	-0.216496	-0.698576	0.265584	0.245858	0.378624		1839	-0.335446	-0.936549	0.265657	0.306487	0.273887		976	-0.242672	-1.06201	0.576669	0.417511	0.561219		1241	-0.015669	-0.761973	0.730635	0.380398	0.96715
	Model 3	2843	-0.22084	-0.702361	0.260681	0.245573	0.368578		1839	-0.343666	-0.942905	0.255573	0.305537	0.260824		976	-0.248506	-1.06716	0.570144	0.417159	0.551509		1241	-0.0240601	-0.768972	0.720851	0.379688	0.949484
	Model 4	2843	-0.233918	-0.704384	0.236548	0.239935	0.329682		1839	-0.299135	-0.88613	0.287861	0.299294	0.317701		976	-0.200257	-1.00359	0.603079	0.409354	0.624811		1241	-0.0190401	-0.749474	0.711394	0.372308	0.959222
	Model 5	2828	-0.195693	-0.666312	0.274927	0.240013	0.414945		1829	-0.264787	-0.854309	0.324735	0.30058	0.378478		963	-0.14942	-0.958495	0.659656	0.412272	0.717112		1241	-0.0198923	-0.750573	0.710788	0.372433	0.957413
	Model 6	2688	-0.260185	-0.738059	0.21769	0.243707	0.285793		1756	-0.421406	-1.01687	0.17406	0.303603	0.16531		931	-0.298958	-1.10689	0.508974	0.41167	0.467898		1173	-0.1717	-0.915763	0.572363	0.379233	0.65081
Pt <0.2	Model 1	2843	-0.129	-0.613649	0.355648	0.247168	0.601772		1839	-0.305667	-0.910248	0.298913	0.30826	0.32153		976	-0.310143	-1.12965	0.509366	0.417597	0.457855		1241	0.0935096	-0.658951	0.84597	0.383536	0.807419
	Model 2	2843	-0.144246	-0.626718	0.338226	0.246058	0.557769		1839	-0.331182	-0.933456	0.271091	0.307084	0.280965		976	-0.252859	-1.06787	0.56215	0.415303	0.542766		1241	0.0696185	-0.677705	0.816942	0.380917	0.855012
	Model 3	2843	-0.141521	-0.623432	0.34039	0.245772	0.564782		1839	-0.33227	-0.932667	0.268128	0.306127	0.277889		976	-0.263272	-1.07765	0.551108	0.414983	0.52596		1241	0.0621392	-0.683786	0.808064	0.380204	0.870202
	Model 4	2843	-0.142489	-0.61362	0.328641	0.240274	0.55321		1839	-0.293919	-0.88202	0.294181	0.299857	0.327119		976	-0.235842	-1.03487	0.563186	0.407159	0.562565		1241	0.0832419	-0.648201	0.814685	0.372822	0.823359
	Model 5	2828	-0.101011	-0.571996	0.369973	0.240199	0.674129		1829	-0.244202	-0.834784	0.346379	0.301121	0.417485		963	-0.178397	-0.982171	0.625376	0.40957	0.663246		1241	0.0851248	-0.646599	0.816848	0.372965	0.819499
	Model 6	2688	-0.182413	-0.6605	0.295674	0.243816	0.45443		1756	-0.41554	-1.0107	0.17962	0.303447	0.171052		931	-0.343302	-1.14682	0.460216	0.409421	0.401967		1173	-0.0755012	-0.81855	0.667548	0.378716	0.842015
Pt <0.3	Model 1	2843	-0.0832232	-0.568692	0.402245	0.247587	0.736792		1839	-0.270425	-0.874769	0.333918	0.30814	0.380273		976	-0.323713	-1.13765	0.490227	0.414759	0.435299		1241	0.0843007	-0.666048	0.834649	0.38246	0.825583
	Model 2	2843	-0.0954976	-0.578776	0.387781	0.24647	0.698444		1839	-0.286513	-0.888484	0.315458	0.30693	0.350695		976	-0.26626	-1.07575	0.543227	0.41249	0.518761		1241	0.0687986	-0.676378	0.813975	0.379823	0.856293
	Model 3	2843	-0.0920722	-0.574791	0.390647	0.246184	0.708435		1839	-0.285721	-0.885819	0.314377	0.305975	0.350527		976	-0.267418	-1.0762	0.541364	0.41213	0.516579		1241	0.0719871	-0.671771	0.815745	0.3791	0.849427
	Model 4	2843	-0.0974505	-0.569389	0.374488	0.240686	0.685592		1839	-0.247314	-0.835117	0.34049	0.299706	0.409373		976	-0.236462	-1.03002	0.557091	0.404369	0.558842		1241	0.0864561	-0.642851	0.815763	0.371734	0.81613
	Model 5	2828	-0.0513988	-0.523219	0.420421	0.240625	0.83087		1829	-0.197973	-0.788391	0.392445	0.301037	0.510855		963	-0.196606	-0.994451	0.601239	0.406549	0.628784		1241	0.0882737	-0.641311	0.817858	0.371875	0.812406
	Model 6	2688	-0.142421	-0.621307	0.336464	0.244223	0.559834		1756	-0.383497	-0.978985	0.21199	0.303614	0.20672		931	-0.34625	-1.14665	0.454154	0.407834	0.396106		1173	-0.0937577	-0.83654	0.649025	0.37858	0.804444
Pt <0.4	Model 1	2843	-0.168993	-0.654553	0.316566	0.247633	0.49502		1839	-0.332194	-0.935018	0.27063	0.307365	0.279938		976	-0.300518	-1.10978	0.508747	0.412377	0.466336		1241	0.0283922	-0.718794	0.775578	0.380848	0.940585
	Model 2	2843	-0.175293	-0.658645	0.30806	0.246507	0.477078		1839	-0.343961	-0.944396	0.256473	0.306146	0.261364		976	-0.237137	-1.04212	0.567841	0.410192	0.563324		1241	0.0195484	-0.722461	0.761557	0.378209	0.958787
	Model 3	2843	-0.171854	-0.654647	0.31094	0.246222	0.485259		1839	-0.344113	-0.942678	0.254452	0.305193	0.259668		976	-0.23757	-1.04185	0.566708	0.409834	0.562272		1241	0.0234096	-0.71719	0.764009	0.37749	0.950562
	Model 4	2843	-0.161918	-0.633852	0.310016	0.240684	0.501167		1839	-0.295107	-0.881465	0.291251	0.298969	0.323733		976	-0.205958	-0.995092	0.583176	0.402118	0.608641		1241	0.0501721	-0.676066	0.77641	0.370169	0.892209
	Model 5	2828	-0.115849	-0.58765	0.355953	0.240615	0.630221		1829	-0.245719	-0.834488	0.343051	0.300197	0.413165		963	-0.168083	-0.961377	0.62521	0.40423	0.677643		1241	0.0517781	-0.674728	0.778284	0.370306	0.888821
	Model 6	2688	-0.205316	-0.684338	0.273706	0.244292	0.400731		1756	-0.42705	-1.02126	0.167164	0.302964	0.158845		931	-0.310692	-1.10621	0.484822	0.405343	0.443582		1173	-0.126381	-0.866044	0.613282	0.37699	0.737507
Pt <0.5	Model 1	2843	-0.190351	-0.675642	0.294941	0.247496	0.441895		1839	-0.33517	-0.937465	0.267125	0.307095	0.275232		976	-0.31348	-1.12398	0.497016	0.413004	0.448025		1241	0.00514553	-0.741748	0.752039	0.380699	0.989218
	Model 2	2843	-0.196442	-0.679527	0.286644	0.246371	0.42532		1839	-0.344515	-0.944415	0.255384	0.305873	0.260173		976	-0.245854	-1.05217	0.560459	0.410872	0.549734		1241	-0.00346346	-0.74518	0.738254	0.37806	0.992692
	Model 3	2843	-0.192746	-0.675273	0.289782	0.246087	0.43355		1839	-0.343754	-0.941787	0.254278	0.304922	0.259742		976	-0.245539	-1.05115	0.560072	0.410514	0.549898		1241	0.00343049	-0.736893	0.743754	0.377349	0.992748
	Model 4	2843	-0.189886	-0.661482	0.28171	0.240511	0.42988		1839	-0.307554	-0.893331	0.278223	0.298673	0.30327		976	-0.229776	-1.02015	0.560602	0.402751	0.568462		1241	0.0168577	-0.709085	0.7428	0.370019	0.963669
	Model 5	2828	-0.143024	-0.614439	0.32839	0.240418	0.55196		1829	-0.257793	-0.845873	0.330288	0.299845	0.390039		963	-0.192316	-0.986696	0.602063	0.404783	0.634819		1241	0.0184977	-0.707715	0.74471	0.370156	0.960152
	Model 6	2688	-0.222619	-0.701297	0.256059	0.244117	0.361885		1756	-0.426379	-1.01999	0.167233	0.302657	0.159078		931	-0.323256	-1.12009	0.473575	0.406014	0.426141		1173	-0.151225	-0.890636	0.588187	0.376862	0.688293
Pt <1	Model 1	2843	-0.175603	-0.660867	0.30966	0.247482	0.478036		1839	-0.327777	-0.929857	0.274303	0.306985	0.285784		976	-0.277142	-1.08742	0.533134	0.412892	0.502242		1241	0.0337064	-0.712904	0.780317	0.380555	0.929437
	Model 2	2843	-0.184082	-0.667144	0.29898	0.246359	0.454999		1839	-0.339815	-0.93951	0.259879	0.305769	0.266565		976	-0.214177	-1.02014	0.591786	0.410695	0.602139		1241	0.0200576	-0.721396	0.761511	0.377926	0.957683
	Model 3	2843	-0.18056	-0.663063	0.301943	0.246074	0.463154		1839	-0.337261	-0.935093	0.260572	0.304819	0.268687		976	-0.214665	-1.01993	0.590597	0.410336	0.600996		1241	0.0270318	-0.713029	0.767092	0.377215	0.942883
	Model 4	2843	-0.183711	-0.655194	0.287772	0.240454	0.44492		1839	-0.305247	-0.890811	0.280316	0.298564	0.306735		976	-0.200653	-0.990683	0.589376	0.402574	0.618298		1241	0.0389792	-0.686702	0.764661	0.369886	0.91609
	Model 5	2828	-0.13466	-0.605967	0.336647	0.240364	0.575365		1829	-0.252818	-0.840643	0.335008	0.299715	0.399046		963	-0.157743	-0.951802	0.636316	0.40462	0.696732		1241	0.0405912	-0.685359	0.766541	0.370022	0.912666
	Model 6	2688	-0.2281	-0.70699	0.250789	0.244225	0.3504		1756	-0.437139	-1.03051	0.156231	0.302534	0.14866		931	-0.305892	-1.10278	0.491	0.406044	0.451437		1173	-0.14608	-0.885455	0.593294	0.376843	0.698352
Abbrevations: AN = anorexia nervosa, Beta = beta estimate/effect size from linear regression, BMI = body mass index, ED = eating disorder, N = number of participants, P-value = p-value of regression coefficient, Pt = p value threshold, SCZ = schizophrenia, SE = standard error

## Sheet: ST 2 PRS-CS linear
Supplementary Table 2. Beta estimates of polygenic score continuous shrinkage (PRS-CS) method regressing disorder severity (i.e., total Clinical Impairment Assessment score) on polygenic scores (PGSs) of anorexia nervosa (AN), schizophrenia (SCZ), or body mass index (BMI).
	Full sample with mixed eating disorder (ED) presenation								Sample with anorexia nervosa (AN) diagnosis							Sample with anorexia nervosa restricting (ANR) subtype						Sample with low-weight (BMI ≤ 17.5) anorexia nervosa
AN PGS calculated by PRS-CS	Models	N	Beta	95%CI low	CI95% up	SE	P-value		N	Beta	95%CI low	CI95% up	SE	P-value		N	Beta	95%CI low	CI95% up	SE	P-value	N	Beta	95%CI low	CI95% up	SE	P-value
	Model 1	2843	0.15	-0.336767	0.631708	0.25	0.55		1839	0.05	-0.550296	0.658536	0.31	0.86		976	-0.35	-0.336767	0.631708	0.43	0.42	1241	0.147471	-0.336767	0.631708	0.246959	0.550457
	Model 2	2843	0.16	-0.317744	0.646393	0.25	0.5		1839	0.03	-0.5702	0.634023	0.31	0.92		976	-0.34	-1.18745	0.500808	0.43	0.42	1241	0.294545	-0.457363	1.04645	0.383254	0.442316
	Model 3	2843	0.16	-0.319725	0.64329	0.25	0.51		1839	0.02	-0.575312	0.625191	0.31	0.94		976	-0.34	-1.1788	0.508131	0.43	0.44	1241	0.3209	-0.429845	1.07165	0.382661	0.401857
	Model 4	2843	0.12	-0.34933	0.591138	0.24	0.61		1839	0.04	-0.545383	0.630361	0.3	0.89		976	-0.32	-1.14606	0.508972	0.42	0.45	1241	0.330829	-0.405307	1.06696	0.375214	0.378109
	Model 5	2828	0.15	-0.325697	0.616263	0.24	0.55		1829	0.07	-0.522431	0.660184	0.3	0.82		963	-0.30	-1.1357	0.539542	0.43	0.49	1241	0.342709	-0.395054	1.08047	0.376044	0.362288
	Model 6	2688	0.07	-0.402437	0.551089	0.24	0.76		1756	-0.07	-0.666022	0.526391	0.3	0.82		931	-0.45	-1.28526	0.385039	0.43	0.29	1173	0.187483	-0.563314	0.93828	0.382665	0.624268
SCZ PGS calculated by PRS-CS	Models	N	Beta	95%CI low	CI95% up	SE	P-value		N	Beta	95%CI low	CI95% up	SE	P-value		N	Beta	95%CI low	CI95% up	SE	P-value	N	Beta	95%CI low	CI95% up	SE	P-value
	Model 1	2843	0.19	-0.297951	0.686159	0.25	0.44		1839	0.16	-0.459724	0.772701	0.31	0.62		976	0.15	-0.676877	0.986464	0.42	0.72	1241	0.579564	-0.164664	1.32379	0.37934	0.126815
	Model 2	2843	0.2	-0.29034	0.689294	0.25	0.42		1839	0.18	-0.427859	0.799966	0.31	0.55		976	0.24	-0.585244	1.07009	0.42	0.57	1241	0.629489	-0.109781	1.36876	0.376812	0.0950636
	Model 3	2843	0.23	-0.263529	0.715633	0.25	0.37		1839	0.19	-0.421591	0.802418	0.31	0.54		976	0.23	-0.598181	1.05607	0.42	0.59	1241	0.638312	-0.0995544	1.37618	0.376097	0.089913
	Model 4	2843	0.26	-0.214658	0.740936	0.24	0.28		1839	0.22	-0.379372	0.819395	0.31	0.47		976	0.27	-0.541593	1.08141	0.41	0.51	1241	0.613678	-0.109911	1.33727	0.368819	0.0963887
	Model 5	2828	0.26	-0.221973	0.732835	0.24	0.29		1829	0.21	-0.390288	0.811391	0.31	0.49		963	0.29	-0.523825	1.10866	0.42	0.48	1241	0.610364	-0.113632	1.33436	0.369027	0.0983876
	Model 6	2688	0.14	-0.349685	0.630574	0.25	0.57		1756	0.18	-0.432105	0.798119	0.31	0.56		931	0.16	-0.668626	0.993321	0.42	0.7	1173	0.585602	-0.163812	1.33502	0.38196	0.125513
BMI PGS calculated by PRS-CS	Models	N	Beta	95%CI low	CI95% up	SE	P-value		N	Beta	95%CI low	CI95% up	SE	P-value		N	Beta	95%CI low	CI95% up	SE	P-value	N	Beta	95%CI low	CI95% up	SE	P-value
	Model 1	2843	0.27	-0.214704	0.74978	0.25	0.28		1839	0.48	-0.117136	1.08092	0.31	0.11		976	0.01	-0.838761	0.861563	0.43	0.98	1241	0.33706	-0.426723	1.10084	0.389307	0.386773
	Model 2	2843	0.24	-0.239176	0.721168	0.24	0.33		1839	0.49	-0.102361	1.09094	0.3	0.1		976	0.06	-0.787632	0.902679	0.43	0.89	1241	0.357451	-0.401052	1.11596	0.386616	0.355375
	Model 3	2843	0.26	-0.220175	0.739372	0.24	0.29		1839	0.51	-0.0816401	1.10806	0.3	0.09		976	0.07	-0.770547	0.918751	0.43	0.86	1241	0.379626	-0.377611	1.13686	0.38597	0.325524
	Model 4	2843	0.18	-0.2847	0.652768	0.24	0.44		1839	0.46	-0.114988	1.05045	0.3	0.12		976	0.06	-0.771848	0.885492	0.42	0.89	1241	0.392905	-0.349588	1.1354	0.378455	0.29939
	Model 5	2828	0.09	-0.380474	0.562164	0.24	0.71		1829	0.46	-0.126803	1.04345	0.3	0.12		963	0.12	-0.710402	0.958374	0.42	0.77	1241	0.3809	-0.364587	1.12639	0.37998	0.31634
	Model 6	2688	0.14	-0.332457	0.620677	0.24	0.55		1756	0.46	-0.131565	1.05668	0.3	0.13		931	-0.09	-0.93399	0.748131	0.43	0.83	1173	0.34153	-0.419819	1.10288	0.388043	0.37897
Abbrevations: AN = anorexia nervosa, Beta = beta estimate/effect size from linear regression, BMI = body mass index, ED = eating disorder, N = number of participants, P-value = p-value of regression coefficient, SCZ = schizophrenia, SE = standard error

## Sheet: ST 3 SCZ PGS linear severity
Supplementary Table 3. Beta estimates of schizophrenia polygenic score (PGS) on disorder severity in either full anorexia nervoisa with other eating disorder (ED), only anorexia nervosa [AN], or only anorexia nervosa restricting subtype (ANR) sample. Polygenic risk scores (PGSs) were generated from SNPs associated with lifetime anorexia nervosa (AN) at P-value thresholds of 1 or lower. The associ…
Model 1: Principal components 1-10, treatment region. Model 2: Same as model 1 and age. Model 3: Same as model 2 and sex. Model 4: (main model): Same as model 3, eating disorder diagnosis and follow-up time (defined as years between first treatment registration and ANGI recruitment). Model 5: Same as model 4 and BMI. Model 6: Same as model 4 and age at eating disorder onset.
Additional eating disorder diagnosis to anorexia nervosa (AN) was only included in the model when analysing the full dataset (N = 2,843).																																							Additional eating disorder diagnosis to anorexia nervosa (AN) was only included in the model when analysing the full dataset (N = 2,843).
N – Number of individuals included in each model, note that in model 5 and 6 fewer individuals are included due to missing data on BMI and age at eating disorder onset.
		Full sample with mixed eating disorder (ED) presentation							Sample with anorexia nervosa (AN) diagnosis							Sample with anorexia nervosa restricting (ANR) subtype							Sample with low-weight (BMI ≤ 17.5) anorexia nervosa
SCZ PGS P-value threshold from the discrovery dataset	Models	N	Beta	95%CI low	CI95% up	SE	P-value		N	Beta	95%CI low	CI95% up	SE	P-value		N	Beta	95%CI low	CI95% up	SE	P-value		N	Beta	95%CI low	CI95% up	SE	P-value
Pt <5e08	Model 1	2843	-0.397517	-0.883031	0.0879974	0.24761	0.108514		1839	-0.554255	-1.16046	0.0519517	0.30909	0.0731089		976	-0.250812	-1.08158	0.579953	0.423333	0.553676		1241	-0.396811	-1.1536	0.359978	0.385742	0.303826
	Model 2	2843	-0.358122	-0.841701	0.125457	0.246623	0.146583		1839	-0.510832	-1.1151	0.0934319	0.308099	0.0974868		976	-0.208137	-1.03403	0.617755	0.420849	0.621021		1241	-0.368057	-1.11975	0.383634	0.383144	0.336931
	Model 3	2843	-0.34804	-0.831115	0.135034	0.246366	0.157855		1839	-0.512797	-1.11518	0.0895816	0.307137	0.0951701		976	-0.196863	-1.02216	0.628433	0.420545	0.63981		1241	-0.350459	-1.10088	0.399966	0.382498	0.359723
	Model 4	2843	-0.255943	-0.72792	0.216035	0.240706	0.287737		1839	-0.394781	-0.985484	0.195922	0.301184	0.190103		976	-0.0565628	-0.867535	0.754409	0.413246	0.891159		1241	-0.226095	-0.962894	0.510703	0.375552	0.547263
	Model 5	2828	-0.282267	-0.75375	0.189215	0.240453	0.240535		1829	-0.423543	-1.01538	0.168299	0.301763	0.160622		963	-0.068324	-0.883784	0.747136	0.415524	0.869429		1241	-0.233625	-0.971292	0.504042	0.375995	0.534484
	Model 6	2688	-0.343636	-0.826464	0.139192	0.246233	0.16296		1756	-0.50799	-1.11507	0.099088	0.309523	0.100937		931	-0.193264	-1.02663	0.6401	0.424629	0.649119		1173	-0.254545	-1.01261	0.503515	0.386367	0.510145
Pt <1e05	Model 1	2843	-0.413421	-0.900147	0.0733056	0.248228	0.0959263		1839	-0.614527	-1.22286	-0.00619061	0.310175	0.0477161		976	-0.197719	-1.01995	0.624508	0.418983	0.637103		1241	-0.309263	-1.05945	0.440923	0.382377	0.418792
	Model 2	2843	-0.36297	-0.847919	0.121979	0.247321	0.142323		1839	-0.57122	-1.17761	0.0351706	0.309183	0.0648347		976	-0.126019	-0.944038	0.692001	0.416838	0.762473		1241	-0.266746	-1.01203	0.478539	0.379878	0.482696
	Model 3	2843	-0.354981	-0.839402	0.12944	0.247052	0.150867		1839	-0.582808	-1.18732	0.0217035	0.308225	0.0588026		976	-0.130137	-0.947457	0.687183	0.416481	0.754753		1241	-0.26229	-1.00617	0.481586	0.37916	0.489216
	Model 4	2843	-0.285983	-0.759157	0.187191	0.241316	0.236079		1839	-0.486101	-1.07869	0.106484	0.302144	0.107825		976	0.00349933	-0.799498	0.806496	0.409182	0.993178		1241	-0.172289	-0.902215	0.557636	0.372049	0.643387
	Model 5	2828	-0.309445	-0.781973	0.163083	0.240986	0.199221		1829	-0.518986	-1.11246	0.0744913	0.302597	0.0864975		963	0.0129729	-0.793632	0.819578	0.411013	0.974827		1241	-0.17764	-0.908138	0.552858	0.372341	0.633383
	Model 6	2688	-0.380656	-0.8628	0.101489	0.245885	0.121716		1756	-0.562193	-1.16832	0.0439352	0.309039	0.0690586		931	-0.0397199	-0.859095	0.779655	0.417501	0.924227		1173	-0.134146	-0.882874	0.614582	0.38161	0.725258
Pt <0.001	Model 1	2843	-0.568778	-1.07163	-0.0659288	0.256451	0.0266419		1839	-0.810773	-1.43728	-0.184269	0.319439	0.0112277		976	-0.555011	-1.39374	0.283721	0.427393	0.194394		1241	-0.581444	-1.35313	0.190241	0.393335	0.1396
	Model 2	2843	-0.53879	-1.03952	-0.038056	0.255372	0.0349611		1839	-0.771306	-1.39573	-0.146882	0.318378	0.0155063		976	-0.494019	-1.32827	0.340232	0.425109	0.245484		1241	-0.521649	-1.28861	0.245308	0.390925	0.182322
	Model 3	2843	-0.532002	-1.03218	-0.031823	0.255088	0.0371083		1839	-0.788213	-1.41071	-0.165713	0.317397	0.013104		976	-0.522378	-1.35649	0.311733	0.425037	0.219367		1241	-0.532466	-1.29798	0.233053	0.390191	0.172621
	Model 4	2843	-0.402648	-0.891752	0.0864561	0.24944	0.106595		1839	-0.684747	-1.29506	-0.0744393	0.31118	0.0278978		976	-0.434671	-1.25364	0.384295	0.417319	0.29787		1241	-0.461365	-1.21239	0.289661	0.382804	0.22835
	Model 5	2828	-0.42344	-0.912028	0.0651485	0.249177	0.0893631		1829	-0.693435	-1.30476	-0.0821051	0.3117	0.0262253		963	-0.411913	-1.23629	0.412465	0.420069	0.327049		1241	-0.467761	-1.21944	0.28392	0.383137	0.222371
	Model 6	2688	-0.576852	-1.07568	-0.0780266	0.254392	0.023435		1756	-0.806383	-1.43114	-0.181626	0.318537	0.0114446		931	-0.566	-1.40035	0.268351	0.425131	0.183406		1173	-0.525633	-1.29624	0.244974	0.392761	0.181062
Pt <0.01	Model 1	2843	-0.237899	-0.785958	0.310161	0.279508	0.394767		1839	-0.530683	-1.20828	0.146912	0.345488	0.124703		976	-0.718327	-1.64289	0.206237	0.47113	0.127666		1241	-0.636849	-1.46563	0.191934	0.422439	0.131926
	Model 2	2843	-0.216005	-0.761646	0.329636	0.278274	0.437678		1839	-0.499367	-1.17449	0.175756	0.344228	0.147039		976	-0.628094	-1.54842	0.292231	0.46897	0.180788		1241	-0.57944	-1.40302	0.244142	0.419787	0.167741
	Model 3	2843	-0.221396	-0.766407	0.323615	0.277953	0.425795		1839	-0.533643	-1.20687	0.139586	0.343262	0.12021		976	-0.661741	-1.58199	0.258513	0.468933	0.158521		1241	-0.593077	-1.41513	0.228976	0.419007	0.157196
	Model 4	2843	-0.0974723	-0.629621	0.434677	0.271393	0.719506		1839	-0.469187	-1.12876	0.190385	0.336299	0.163141		976	-0.562812	-1.46642	0.340792	0.460448	0.22189		1241	-0.547078	-1.35333	0.259173	0.410953	0.183358
	Model 5	2828	-0.117072	-0.648289	0.414146	0.270917	0.66568		1829	-0.514086	-1.17397	0.1458	0.336457	0.126703		963	-0.6254	-1.531	0.280197	0.461455	0.175653		1241	-0.548968	-1.35552	0.25758	0.411104	0.18201
	Model 6	2688	-0.296711	-0.841361	0.247938	0.277761	0.285516		1756	-0.610132	-1.2852	0.0649358	0.344188	0.0764591		931	-0.732443	-1.65932	0.194438	0.472279	0.12128		1173	-0.70265	-1.53272	0.127419	0.423068	0.0970166
Pt <0.05	Model 1	2843	-0.340549	-0.913273	0.232174	0.292086	0.243745		1839	-0.826717	-1.53942	-0.114014	0.363389	0.0230206		976	-1.14893	-2.11354	-0.184316	0.491538	0.0196223		1241	-0.970402	-1.83511	-0.105693	0.44075	0.027872
	Model 2	2843	-0.327167	-0.897316	0.242983	0.290773	0.260616		1839	-0.841405	-1.55126	-0.131549	0.361937	0.020196		976	-1.11582	-2.07464	-0.157004	0.488584	0.022602		1241	-0.976194	-1.83486	-0.117532	0.437667	0.0258985
	Model 3	2843	-0.334288	-0.903785	0.235209	0.290441	0.249842		1839	-0.870908	-1.57866	-0.163158	0.360863	0.0159026		976	-1.14407	-2.10246	-0.185684	0.488365	0.0193507		1241	-0.988301	-1.84533	-0.131273	0.436835	0.0238467
	Model 4	2843	-0.269783	-0.825838	0.286272	0.283585	0.341518		1839	-0.777402	-1.47104	-0.0837615	0.35367	0.0280672		976	-1.00362	-1.94547	-0.0617565	0.479941	0.0367804		1241	-0.932025	-1.77267	-0.0913781	0.428485	0.0298089
	Model 5	2828	-0.264856	-0.819664	0.289952	0.282948	0.349324		1829	-0.789271	-1.48284	-0.0957024	0.353631	0.0257434		963	-1.02885	-1.97155	-0.0861422	0.480362	0.0324644		1241	-0.932761	-1.77368	-0.0918376	0.428625	0.0297338
	Model 6	2688	-0.479811	-1.04928	0.0896594	0.290419	0.0986256		1756	-0.925455	-1.63621	-0.214702	0.362383	0.0107401		931	-1.12235	-2.08558	-0.159111	0.490803	0.0224387		1173	-1.10775	-1.97547	-0.240026	0.442258	0.0123909
Pt <0.1	Model 1	2843	-0.227873	-0.810904	0.355159	0.297343	0.443525		1839	-0.801153	-1.52161	-0.0806996	0.367341	0.0293144		976	-0.951169	-1.93543	0.0330965	0.501552	0.0582005		1241	-0.862476	-1.74521	0.0202571	0.449937	0.0554856
	Model 2	2843	-0.23325	-0.81363	0.347129	0.29599	0.430743		1839	-0.829592	-1.54723	-0.111951	0.365907	0.0234935		976	-0.922889	-1.90115	0.05537	0.498491	0.0644243		1241	-0.898885	-1.77551	-0.0222591	0.446824	0.0444683
	Model 3	2843	-0.236352	-0.816053	0.343349	0.295644	0.424098		1839	-0.848727	-1.56416	-0.133295	0.364781	0.0200916		976	-0.942887	-1.92049	0.034718	0.498157	0.0586923		1241	-0.891912	-1.7669	-0.0169238	0.445989	0.0457371
	Model 4	2843	-0.216221	-0.781952	0.34951	0.28852	0.45367		1839	-0.803493	-1.5043	-0.102688	0.357322	0.0246539		976	-0.913125	-1.8723	0.0460505	0.488765	0.0620357		1241	-0.889097	-1.74703	-0.0311648	0.437295	0.0422507
	Model 5	2828	-0.178437	-0.743332	0.386458	0.288092	0.535721		1829	-0.775576	-1.47741	-0.0737461	0.357843	0.0303375		963	-0.912573	-1.87405	0.0489065	0.48993	0.062821		1241	-0.8872	-1.74546	-0.0289403	0.437461	0.0427705
	Model 6	2688	-0.41363	-0.992612	0.165352	0.29527	0.161375		1756	-0.903968	-1.62207	-0.185862	0.366132	0.013646		931	-0.93198	-1.91108	0.0471242	0.498888	0.0620672		1173	-1.02589	-1.91203	-0.139744	0.451649	0.0233045
Pt <0.2	Model 1	2843	-0.131614	-0.712511	0.449284	0.296255	0.65689		1839	-0.722344	-1.44128	-0.00340727	0.366568	0.0489252		976	-0.961128	-1.93403	0.0117751	0.495762	0.0528323		1241	-0.760243	-1.64188	0.12139	0.449377	0.0909435
	Model 2	2843	-0.128435	-0.706692	0.449821	0.294908	0.663226		1839	-0.741733	-1.45782	-0.0256457	0.365115	0.0423485		976	-0.949639	-1.91644	0.017164	0.492654	0.0541999		1241	-0.772862	-1.64834	0.102617	0.44624	0.0835355
	Model 3	2843	-0.120341	-0.69795	0.457268	0.294578	0.682922		1839	-0.748236	-1.46208	-0.0343876	0.363973	0.0399493		976	-0.968801	-1.93494	-0.00266068	0.492315	0.0493737		1241	-0.776208	-1.65001	0.0975914	0.445383	0.081622
	Model 4	2843	-0.0796081	-0.643473	0.484257	0.287568	0.781929		1839	-0.675928	-1.37535	0.0234913	0.356616	0.0581984		976	-0.890087	-1.83849	0.0583167	0.483276	0.0658171		1241	-0.737487	-1.59443	0.119459	0.436793	0.0915868
	Model 5	2828	-0.0496218	-0.612715	0.513471	0.287174	0.862826		1829	-0.661869	-1.36225	0.0385106	0.357104	0.0639827		963	-0.911865	-1.86303	0.0393027	0.484676	0.0602265		1241	-0.734176	-1.59154	0.123193	0.437007	0.0932115
	Model 6	2688	-0.22322	-0.799154	0.352715	0.293716	0.447331		1756	-0.763837	-1.47885	-0.0488211	0.364556	0.0362933		931	-0.936797	-1.90004	0.0264425	0.490805	0.0566154		1173	-0.834699	-1.71619	0.0467908	0.449276	0.0634413
Pt <0.3	Model 1	2843	0.00937409	-0.567529	0.586277	0.294218	0.974585		1839	-0.506541	-1.21928	0.206202	0.36341	0.16353		976	-0.824631	-1.80325	0.15399	0.498676	0.0985276		1241	-0.533973	-1.41362	0.34567	0.448362	0.233907
	Model 2	2843	0.0249755	-0.549332	0.599283	0.292894	0.932052		1839	-0.512972	-1.22287	0.196925	0.361959	0.156592		976	-0.810927	-1.78343	0.161575	0.495557	0.102085		1241	-0.530644	-1.40418	0.34289	0.445248	0.233573
	Model 3	2843	0.0330572	-0.540605	0.606719	0.292565	0.910046		1839	-0.514935	-1.22262	0.192748	0.36083	0.153726		976	-0.817365	-1.78903	0.154295	0.495128	0.0991038		1241	-0.533536	-1.4054	0.338327	0.444396	0.230144
	Model 4	2843	0.0800019	-0.480255	0.640259	0.285728	0.779503		1839	-0.468031	-1.16124	0.225177	0.353449	0.185609		976	-0.729008	-1.68291	0.224896	0.486079	0.134003		1241	-0.507282	-1.36226	0.347695	0.435789	0.244629
	Model 5	2828	0.0930761	-0.466443	0.652595	0.285351	0.744312		1829	-0.473084	-1.16725	0.221082	0.353935	0.181509		963	-0.774295	-1.73183	0.183238	0.487919	0.112863		1241	-0.503445	-1.35888	0.351993	0.436023	0.248468
	Model 6	2688	-0.0683071	-0.638494	0.50188	0.290785	0.8143		1756	-0.601336	-1.30907	0.106397	0.360843	0.0957991		931	-0.797087	-1.76643	0.172258	0.493916	0.106915		1173	-0.628168	-1.50589	0.249551	0.447354	0.160533
Pt <0.4	Model 1	2843	0.0387307	-0.533376	0.610837	0.291772	0.894406		1839	-0.440075	-1.14371	0.263564	0.358768	0.220121		976	-0.705892	-1.67171	0.259929	0.492154	0.151815		1241	-0.403739	-1.27453	0.467049	0.443849	0.363196
	Model 2	2843	0.0596421	-0.509914	0.629198	0.290471	0.83733		1839	-0.435209	-1.13605	0.265634	0.357342	0.223418		976	-0.677852	-1.63777	0.282062	0.489143	0.166132		1241	-0.389573	-1.25435	0.475208	0.440787	0.37697
	Model 3	2843	0.0644224	-0.504475	0.63332	0.290135	0.824296		1839	-0.449761	-1.14845	0.248928	0.356243	0.206927		976	-0.691465	-1.65064	0.267708	0.488765	0.157476		1241	-0.402705	-1.26588	0.460473	0.439969	0.360213
	Model 4	2843	0.0762384	-0.47912	0.631597	0.28323	0.787814		1839	-0.426517	-1.11082	0.257787	0.348909	0.221703		976	-0.630589	-1.57192	0.310745	0.479674	0.188953		1241	-0.388793	-1.23521	0.457624	0.431426	0.367669
	Model 5	2828	0.0796302	-0.475087	0.634348	0.282902	0.778366		1829	-0.441385	-1.12671	0.243943	0.349429	0.206694		963	-0.679711	-1.6251	0.265677	0.481731	0.158581		1241	-0.386647	-1.23339	0.460101	0.431594	0.370505
	Model 6	2688	-0.0881175	-0.653959	0.477724	0.288569	0.760115		1756	-0.55909	-1.2573	0.139124	0.35599	0.116476		931	-0.672645	-1.62751	0.282219	0.486537	0.167153		1173	-0.494476	-1.36135	0.372393	0.441824	0.263301
Pt <0.5	Model 1	2843	0.0301977	-0.540914	0.60131	0.291264	0.917432		1839	-0.451229	-1.15566	0.253204	0.359173	0.209168		976	-0.660426	-1.63306	0.312209	0.495626	0.183009		1241	-0.448706	-1.32302	0.425606	0.445645	0.314197
	Model 2	2843	0.0604965	-0.508129	0.629122	0.289996	0.834767		1839	-0.4349	-1.13659	0.266792	0.357775	0.224307		976	-0.633825	-1.60049	0.33284	0.492583	0.198496		1241	-0.420835	-1.28921	0.447538	0.442618	0.3419
	Model 3	2843	0.0668318	-0.501143	0.634807	0.289664	0.817548		1839	-0.441079	-1.14059	0.258429	0.356661	0.216362		976	-0.645017	-1.6109	0.320865	0.492184	0.190334		1241	-0.432956	-1.29971	0.433797	0.441792	0.327279
	Model 4	2843	0.0805239	-0.473821	0.634869	0.282713	0.775798		1839	-0.416702	-1.10181	0.268407	0.34932	0.233065		976	-0.568304	-1.51637	0.379759	0.483103	0.239743		1241	-0.415531	-1.26546	0.434402	0.433218	0.337661
	Model 5	2828	0.0861356	-0.467605	0.639876	0.282404	0.760382		1829	-0.426125	-1.11245	0.260203	0.349939	0.223493		963	-0.626721	-1.57878	0.325343	0.485132	0.196724		1241	-0.412182	-1.26253	0.438164	0.433428	0.341802
	Model 6	2688	-0.0717811	-0.636173	0.492611	0.28783	0.80308		1756	-0.517391	-1.2156	0.180817	0.355987	0.146294		931	-0.599481	-1.55962	0.360662	0.489227	0.220755		1173	-0.489843	-1.35863	0.378943	0.442801	0.268854
Pt <1	Model 1	2843	-0.0573949	-0.622612	0.507822	0.288258	0.842191		1839	-0.538164	-1.23298	0.156652	0.354269	0.128915		976	-0.796993	-1.75869	0.164703	0.490052	0.104204		1241	-0.53391	-1.40247	0.334649	0.442713	0.228052
	Model 2	2843	-0.0201551	-0.58298	0.54267	0.287038	0.944025		1839	-0.519259	-1.2114	0.172879	0.352904	0.141358		976	-0.763802	-1.71969	0.192087	0.487092	0.117191		1241	-0.503595	-1.36629	0.359096	0.439721	0.252325
	Model 3	2843	-0.0155374	-0.577712	0.546637	0.286706	0.956785		1839	-0.515903	-1.20589	0.174087	0.351808	0.142703		976	-0.767185	-1.72224	0.187867	0.486665	0.115261		1241	-0.50501	-1.36605	0.35603	0.43888	0.250089
	Model 4	2843	-0.00965121	-0.558588	0.539286	0.279955	0.972501		1839	-0.479415	-1.15525	0.19642	0.344591	0.164317		976	-0.6258	-1.56423	0.312627	0.478193	0.190958		1241	-0.452992	-1.29749	0.39151	0.43045	0.292838
	Model 5	2828	-0.00472338	-0.553375	0.543928	0.279808	0.986533		1829	-0.490135	-1.16785	0.187584	0.345549	0.15624		963	-0.691442	-1.63531	0.252422	0.480954	0.150866		1241	-0.447846	-1.29296	0.397269	0.430762	0.298704
	Model 6	2688	-0.131062	-0.689331	0.427207	0.284707	0.64531		1756	-0.556593	-1.24543	0.132243	0.351208	0.113195		931	-0.646415	-1.59739	0.304562	0.484557	0.182526		1173	-0.510966	-1.3752	0.353264	0.440479	0.246279
Abbrevations: AN = anorexia nervosa, Beta = beta estimate/effect size from linear regression, BMI = body mass index, ED = eating disorder, N = number of participants, P-value = p-value of regression coefficient, Pt = p value threshold, SCZ = schizophrenia, SE = standard error

## Sheet: ST 4 BMI PGS linear severity
Supplementary Table 4. Beta estimates of body mass index polygenic score (PGS) on disorder severity in either full anorexia nervoisa with other eating disorder (ED), only anorexia nervosa [AN], or only anorexia nervosa restricting subtype (ANR) sample. Polygenic risk scores (PGSs) were generated from SNPs associated with lifetime anorexia nervosa (AN) at P-value thresholds of 1 or lower. The asso…
Model 1: Principal components 1-10, treatment region. Model 2: Same as model 1 and age. Model 3: Same as model 2 and sex. Model 4: (main model): Same as model 3, eating disorder diagnosis and follow-up time (defined as years between first treatment registration and ANGI recruitment). Model 5: Same as model 4 and BMI. Model 6: Same as model 4 and age at eating disorder onset.
Additional eating disorder diagnosis to anorexia nervosa (AN) was only included in the model when analysing the full dataset (N = 2,843).
N – Number of individuals included in each model, note that in model 5 and 6 fewer individuals are included due to missing data on BMI and age at eating disorder onset.
		Full sample with mixed eating disorder (ED) presentation							Sample with anorexia nervosa (AN) diagnosis							Sample with anorexia nervosa restricting (ANR) subtype							Sample with low-weight (BMI ≤ 17.5) anorexia nervosa
BMI PGS P-value threshold from the discrovery dataset	Models	N	Beta	95%CI low	CI95% up	SE	P-value		N	Beta	95%CI low	CI95% up	SE	P-value		N	Beta	95%CI low	CI95% up	SE	P-value		N	Beta	95%CI low	CI95% up	SE	P-value
Pt <5e08	Model 1	2843	0.76245	0.28122	1.24368	0.245424	0.00191094		1839	1.04014	0.442999	1.63728	0.304468	0.000648813		976	0.81593	-0.00522327	1.63708	0.418435	0.0514722		1241	1.12596	0.38268	1.86924	0.378856	0.00301646
	Model 2	2843	0.756031	0.276979	1.23508	0.244314	0.00199072		1839	1.07983	0.484929	1.67474	0.303327	0.000380416		976	0.895639	0.0789552	1.71232	0.416157	0.0316333		1241	1.17616	0.437987	1.91434	0.376255	0.00181389
	Model 3	2843	0.779599	0.300892	1.25831	0.244138	0.00142218		1839	1.12359	0.530262	1.71693	0.302525	0.000210107		976	0.914527	0.0983496	1.7307	0.415898	0.0281221		1241	1.21398	0.476826	1.95113	0.375734	0.00126662
	Model 4	2843	0.799911	0.332246	1.26758	0.238507	0.000807548		1839	1.13155	0.550594	1.71251	0.296216	0.000137915		976	0.978907	0.178325	1.77949	0.407951	0.0166047		1241	1.25553	0.532969	1.9781	0.368298	0.000673215
	Model 5	2828	0.686294	0.21529	1.1573	0.240208	0.00430715		1829	1.08691	0.502014	1.67181	0.298223	0.000275357		963	1.0091	0.199061	1.81914	0.412764	0.0146776		1241	1.25045	0.524647	1.97625	0.369948	0.000747552
	Model 6	2688	0.765007	0.28853	1.24148	0.242995	0.00166072		1756	1.13606	0.542234	1.72989	0.302769	0.000181015		931	0.917512	0.103185	1.73184	0.414929	0.0272661		1173	1.2675	0.525292	2.00971	0.378288	0.0008324
Pt <1e05	Model 1	2843	0.729414	0.248424	1.2104	0.245302	0.00296885		1839	1.10244	0.510349	1.69453	0.301892	0.000267788		976	0.870697	0.0570795	1.68432	0.414595	0.0359793		1241	1.03333	0.301522	1.76515	0.373011	0.005686
	Model 2	2843	0.734998	0.25621	1.21378	0.244179	0.00263491		1839	1.1642	0.574013	1.75439	0.300922	0.000113227		976	0.952572	0.143352	1.76179	0.412354	0.021095		1241	1.12062	0.3933	1.84794	0.370723	0.00255653
	Model 3	2843	0.766081	0.287462	1.2447	0.244093	0.00171581		1839	1.22832	0.6393	1.81733	0.300325	4.50248e-05		976	0.981759	0.172713	1.79081	0.412265	0.0174424		1241	1.15438	0.428138	1.88062	0.370171	0.00186018
	Model 4	2843	0.781702	0.313688	1.24972	0.238685	0.00106925		1839	1.20816	0.631313	1.78502	0.294122	4.17336e-05		976	0.994832	0.201261	1.7884	0.404378	0.0140637		1241	1.16103	0.449054	1.87301	0.3629	0.00141296
	Model 5	2828	0.674968	0.203054	1.14688	0.240673	0.00507417		1829	1.18754	0.606986	1.76809	0.296007	6.27031e-05		963	1.05414	0.254672	1.8536	0.407374	0.00981223		1241	1.15545	0.440219	1.87069	0.36456	0.00156525
	Model 6	2688	0.760809	0.282258	1.23936	0.244052	0.001844		1756	1.24203	0.651064	1.83299	0.301308	3.931e-05		931	0.937522	0.128899	1.74615	0.412022	0.0231124		1173	1.21279	0.477147	1.94844	0.374943	0.00125266
Pt <0.001	Model 1	2843	0.857997	0.376552	1.33944	0.245535	0.000482427		1839	1.25437	0.658404	1.85033	0.303867	3.82418e-05		976	0.777536	-0.0254802	1.58055	0.409193	0.0577104		1241	1.03846	0.304808	1.7721	0.373947	0.00556975
	Model 2	2843	0.836616	0.35725	1.31598	0.244474	0.000630226		1839	1.293	0.699316	1.88668	0.302703	2.04164e-05		976	0.845743	0.0472853	1.6442	0.40687	0.0379142		1241	1.10372	0.374918	1.83252	0.371477	0.00302461
	Model 3	2843	0.857305	0.378344	1.33627	0.244267	0.000455627		1839	1.35562	0.763201	1.94804	0.302059	7.64192e-06		976	0.87949	0.0809663	1.67801	0.406903	0.0309096		1241	1.13668	0.408972	1.86438	0.370917	0.00222805
	Model 4	2843	0.826879	0.358261	1.2955	0.238992	0.000548494		1839	1.30081	0.720364	1.88126	0.295955	1.17e-05		976	0.878317	0.0949922	1.66164	0.399157	0.0200964		1241	1.16841	0.455073	1.88175	0.363595	0.00134553
	Model 5	2828	0.720886	0.248093	1.19368	0.241121	0.00281655		1829	1.28471	0.698772	1.87065	0.298753	1.79733e-05		963	0.925762	0.136652	1.71487	0.402097	0.0215335		1241	1.16352	0.446134	1.88091	0.365658	0.0014995
	Model 6	2688	0.790819	0.313699	1.26794	0.243322	0.00116806		1756	1.30271	0.711643	1.89378	0.30136	1.62825e-05		931	0.797836	0.00493458	1.59074	0.404011	0.0485941		1173	1.12259	0.392097	1.85309	0.372316	0.0026247
Pt <0.01	Model 1	2843	0.756027	0.273323	1.23873	0.246177	0.00215317		1839	1.13921	0.54289	1.73554	0.304051	0.000184684		976	0.764341	-0.0373659	1.56605	0.408526	0.0616529		1241	0.877425	0.137104	1.61775	0.377348	0.020222
	Model 2	2843	0.737163	0.256569	1.21776	0.2451	0.00265644		1839	1.18094	0.586848	1.77504	0.302914	0.000100252		976	0.831865	0.0347148	1.62902	0.406204	0.0408415		1241	0.944579	0.209065	1.68009	0.374898	0.0118765
	Model 3	2843	0.766827	0.286441	1.24721	0.244994	0.00176603		1839	1.26298	0.669598	1.85636	0.302549	3.12792e-05		976	0.87347	0.0758419	1.6711	0.406446	0.0318811		1241	0.988328	0.253608	1.72305	0.374493	0.00841807
	Model 4	2843	0.730911	0.261015	1.20081	0.239645	0.00230986		1839	1.19464	0.613123	1.77616	0.296501	5.82887e-05		976	0.84786	0.0652622	1.63046	0.398787	0.0337506		1241	0.99061	0.270265	1.71096	0.367166	0.007072
	Model 5	2828	0.636003	0.161983	1.11002	0.241747	0.0085635		1829	1.19389	0.606729	1.78106	0.299379	6.93205e-05		963	0.932138	0.143574	1.7207	0.40182	0.0205649		1241	0.983448	0.260522	1.70637	0.368481	0.00771027
	Model 6	2688	0.760649	0.282833	1.23846	0.243677	0.00181837		1756	1.25143	0.659926	1.84294	0.301585	3.49283e-05		931	0.865285	0.0738879	1.65668	0.403245	0.0321522		1173	1.03154	0.295623	1.76746	0.375082	0.00604943
Pt <0.05	Model 1	2843	0.856575	0.372416	1.34073	0.246919	0.000530104		1839	1.19772	0.600035	1.79541	0.304747	8.80342e-05		976	0.876692	0.062826	1.69056	0.414722	0.0347788		1241	1.01237	0.261697	1.76304	0.382624	0.00825281
	Model 2	2843	0.83465	0.352578	1.31672	0.245854	0.000696013		1839	1.23694	0.641526	1.83236	0.303587	4.81094e-05		976	0.910955	0.102196	1.71971	0.412119	0.0273116		1241	1.06504	0.319468	1.81061	0.380025	0.00514993
	Model 3	2843	0.863633	0.381801	1.34546	0.245732	0.000447446		1839	1.32226	0.727498	1.91703	0.303255	1.37186e-05		976	0.962823	0.153025	1.77262	0.412648	0.0198396		1241	1.11021	0.365452	1.85498	0.379612	0.00351254
	Model 4	2843	0.845246	0.374066	1.31643	0.240299	0.000442566		1839	1.28788	0.705309	1.87045	0.297037	1.53211e-05		976	0.925079	0.130441	1.71972	0.404922	0.0225553		1241	1.12327	0.393139	1.85339	0.372152	0.00259464
	Model 5	2828	0.750139	0.27405	1.22623	0.242802	0.00202457		1829	1.29103	0.702069	1.87999	0.300293	1.80551e-05		963	1.01098	0.209303	1.81266	0.408503	0.0135042		1241	1.11675	0.384324	1.84918	0.373325	0.002833
	Model 6	2688	0.88562	0.405878	1.36536	0.24466	0.000300321		1756	1.35216	0.758888	1.94544	0.302486	8.32162e-06		931	0.958121	0.153946	1.7623	0.409756	0.0195886		1173	1.1738	0.426206	1.9214	0.381034	0.00211493
Pt <0.1	Model 1	2843	0.854124	0.367999	1.34025	0.247921	0.000579077		1839	1.15555	0.555225	1.75587	0.30609	0.000165001		976	0.743248	-0.0748871	1.56138	0.416897	0.0749334		1241	0.927356	0.174639	1.68007	0.383667	0.0157906
	Model 2	2843	0.833974	0.349961	1.31799	0.246844	0.000738576		1839	1.19446	0.596414	1.7925	0.304927	9.2893e-05		976	0.772609	-0.0403869	1.5856	0.414278	0.0624932		1241	0.977028	0.229427	1.72463	0.381059	0.0104664
	Model 3	2843	0.860972	0.377248	1.3447	0.246697	0.000490409		1839	1.27461	0.67736	1.87186	0.304523	2.97968e-05		976	0.819989	0.00617436	1.6338	0.414695	0.0482904		1241	1.01763	0.270958	1.76431	0.380588	0.00759843
	Model 4	2843	0.839477	0.366557	1.3124	0.241186	0.00050786		1839	1.24622	0.661253	1.83118	0.298258	3.07584e-05		976	0.789129	-0.00938816	1.58765	0.406899	0.0527495		1241	1.03457	0.302552	1.76658	0.373114	0.00564229
	Model 5	2828	0.739388	0.26104	1.21774	0.243954	0.002461		1829	1.24875	0.657453	1.84004	0.301485	3.60202e-05		963	0.878854	0.0724742	1.68524	0.410898	0.0327031		1241	1.02758	0.293378	1.76179	0.374229	0.00612384
	Model 6	2688	0.880889	0.399658	1.36212	0.245419	0.000337514		1756	1.32284	0.726612	1.91907	0.303991	1.43032e-05		931	0.838402	0.0296042	1.6472	0.412111	0.0421998		1173	1.11043	0.359787	1.86107	0.382585	0.0037732
Pt <0.2	Model 1	2843	0.901719	0.41488	1.38856	0.248286	0.000286472		1839	1.19477	0.591415	1.79813	0.307636	0.000106541		976	0.762109	-0.0579795	1.5822	0.417893	0.0685089		1241	0.984969	0.23223	1.73771	0.383678	0.0103709
	Model 2	2843	0.883524	0.398815	1.36823	0.247199	0.000357264		1839	1.23914	0.638029	1.84026	0.306494	5.49774e-05		976	0.795509	-0.0194519	1.61047	0.415279	0.0557131		1241	1.03516	0.287544	1.78277	0.381064	0.00669084
	Model 3	2843	0.906961	0.422621	1.3913	0.247011	0.000245369		1839	1.3157	0.715509	1.91589	0.306021	1.80345e-05		976	0.840941	0.0252974	1.65658	0.415626	0.0433186		1241	1.07489	0.328243	1.82154	0.380574	0.00481381
	Model 4	2843	0.887251	0.413641	1.36086	0.241539	0.000243866		1839	1.29106	0.703242	1.87887	0.299711	1.7378e-05		976	0.812491	0.0121992	1.61278	0.407803	0.0466153		1241	1.0905	0.35852	1.82248	0.373096	0.0035324
	Model 5	2828	0.800717	0.32204	1.27939	0.244122	0.00105081		1829	1.30731	0.713166	1.90146	0.302938	1.67916e-05		963	0.908444	0.100324	1.71656	0.411784	0.0276164		1241	1.08395	0.350119	1.81778	0.374039	0.00382309
	Model 6	2688	0.936594	0.455087	1.4181	0.245559	0.000139773		1756	1.36792	0.769762	1.96608	0.304976	7.75704e-06		931	0.858571	0.0489943	1.66815	0.412508	0.0376813		1173	1.15164	0.402211	1.90106	0.381965	0.00262576
Pt <0.3	Model 1	2843	0.90861	0.421591	1.39563	0.248377	0.000258641		1839	1.23185	0.628359	1.83534	0.307703	6.49525e-05		976	0.807061	-0.0178845	1.63201	0.420368	0.0551675		1241	1.00641	0.251914	1.7609	0.384571	0.00898102
	Model 2	2843	0.891446	0.406567	1.37633	0.247286	0.000317646		1839	1.27741	0.676151	1.87866	0.306565	3.23309e-05		976	0.838148	0.0183864	1.65791	0.417726	0.045088		1241	1.05689	0.307538	1.80623	0.381949	0.00574117
	Model 3	2843	0.912294	0.42783	1.39676	0.247074	0.00022636		1839	1.35351	0.753214	1.95381	0.306077	1.03503e-05		976	0.881686	0.0613831	1.70199	0.418001	0.0351783		1241	1.09696	0.348579	1.84535	0.381458	0.00410107
	Model 4	2843	0.879652	0.405805	1.3535	0.241659	0.000277487		1839	1.31592	0.727907	1.90393	0.299812	1.20327e-05		976	0.843662	0.0387197	1.64861	0.410173	0.0399718		1241	1.10923	0.375541	1.84292	0.373966	0.00307443
	Model 5	2828	0.789551	0.310607	1.2685	0.244258	0.0012416		1829	1.32734	0.733009	1.92168	0.303033	1.25389e-05		963	0.926999	0.114131	1.73987	0.414204	0.0254521		1241	1.10279	0.367332	1.83824	0.374866	0.00332457
	Model 6	2688	0.931183	0.449234	1.41313	0.245785	0.000154847		1756	1.38543	0.786494	1.98437	0.305372	6.10147e-06		931	0.869917	0.0548773	1.68496	0.415291	0.0364722		1173	1.1611	0.408852	1.91336	0.383406	0.00251326
Pt <0.4	Model 1	2843	0.88259	0.395124	1.37006	0.248605	0.000391266		1839	1.19441	0.589471	1.79936	0.308445	0.000111583		976	0.749998	-0.0778711	1.57787	0.421857	0.0757454		1241	0.959616	0.201964	1.71727	0.386182	0.0130922
	Model 2	2843	0.865428	0.380105	1.35075	0.247513	0.000478667		1839	1.23973	0.637021	1.84244	0.307305	5.70545e-05		976	0.775301	-0.0473429	1.59794	0.419194	0.0646928		1241	1.00644	0.253968	1.7589	0.383539	0.00879661
	Model 3	2843	0.887952	0.403012	1.37289	0.247317	0.000335865		1839	1.3195	0.717633	1.92136	0.306875	1.80008e-05		976	0.822608	-0.000828243	1.64604	0.419598	0.0502304		1241	1.04985	0.298245	1.80145	0.383099	0.00622555
	Model 4	2843	0.857054	0.382698	1.33141	0.241919	0.000402428		1839	1.28939	0.699899	1.87888	0.300565	1.88155e-05		976	0.791536	-0.0164209	1.59949	0.411709	0.0548317		1241	1.07514	0.33832	1.81196	0.375563	0.00427164
	Model 5	2828	0.764503	0.285158	1.24385	0.244463	0.00178244		1829	1.29696	0.701215	1.89271	0.303755	2.0585e-05		963	0.872228	0.0566644	1.68779	0.415577	0.036097		1241	1.0686	0.330118	1.80709	0.376412	0.00460166
	Model 6	2688	0.900003	0.417503	1.3825	0.246066	0.000259561		1756	1.34635	0.745938	1.94676	0.306124	1.15859e-05		931	0.798562	-0.0196962	1.61682	0.416932	0.0557632		1173	1.1096	0.354219	1.86498	0.385001	0.00402396
Pt <0.5	Model 1	2843	0.913192	0.425604	1.40078	0.248667	0.000244789		1839	1.21588	0.612348	1.81941	0.307724	8.07267e-05		976	0.767547	-0.0591157	1.59421	0.421243	0.0687506		1241	0.989075	0.231606	1.74654	0.386089	0.0105325
	Model 2	2843	0.894265	0.408804	1.37973	0.247582	0.000309148		1839	1.25757	0.656317	1.85882	0.306564	4.27368e-05		976	0.788605	-0.0328188	1.61003	0.418573	0.0598627		1241	1.03045	0.27821	1.78269	0.383422	0.00729646
	Model 3	2843	0.915064	0.430021	1.40011	0.247369	0.00022042		1839	1.33356	0.733258	1.93386	0.306079	1.39258e-05		976	0.833788	0.0117061	1.65587	0.418907	0.046832		1241	1.07171	0.320399	1.82301	0.382947	0.00521352
	Model 4	2843	0.881759	0.40731	1.35621	0.241967	0.000273133		1839	1.29542	0.707401	1.88344	0.299817	1.6392e-05		976	0.794811	-0.0118839	1.60151	0.411066	0.0534648		1241	1.09071	0.354168	1.82724	0.375419	0.00373508
	Model 5	2828	0.790655	0.311234	1.27008	0.244501	0.00123597		1829	1.30296	0.708717	1.89719	0.302985	1.79608e-05		963	0.873721	0.0593292	1.68811	0.41498	0.035516		1241	1.08424	0.346045	1.82243	0.376263	0.00402586
	Model 6	2688	0.920888	0.438449	1.40333	0.246035	0.000185745		1756	1.35043	0.75171	1.94914	0.30526	1.02975e-05		931	0.801338	-0.0158466	1.61852	0.416385	0.0546014		1173	1.12151	0.366666	1.87635	0.384725	0.00362467
Pt <1	Model 1	2843	0.89554	0.407568	1.38351	0.248863	0.000325527		1839	1.21299	0.609079	1.8169	0.307919	8.47938e-05		976	0.773293	-0.055422	1.60201	0.422288	0.0673811		1241	0.972542	0.214652	1.73043	0.386303	0.0119439
	Model 2	2843	0.876127	0.390281	1.36197	0.247779	0.000412888		1839	1.25354	0.651914	1.85516	0.306752	4.56981e-05		976	0.793458	-0.0300019	1.61692	0.41961	0.0589334		1241	1.01204	0.25939	1.76468	0.383631	0.00844419
	Model 3	2843	0.897068	0.411636	1.3825	0.247568	0.000295742		1839	1.33111	0.730393	1.93182	0.306289	1.46347e-05		976	0.84165	0.0173528	1.66595	0.420036	0.0453774		1241	1.05572	0.303932	1.80751	0.383194	0.00595517
	Model 4	2843	0.867455	0.392634	1.34228	0.242156	0.000346454		1839	1.29741	0.709019	1.8858	0.300005	1.61068e-05		976	0.802729	-0.00613821	1.6116	0.412173	0.0517605		1241	1.0787	0.341696	1.81571	0.375658	0.00415577
	Model 5	2828	0.774423	0.294568	1.25428	0.244723	0.0015702		1829	1.30273	0.708046	1.89742	0.303214	1.82824e-05		963	0.880497	0.0636305	1.69736	0.416241	0.0346617		1241	1.07211	0.33337	1.81086	0.376544	0.00448371
	Model 6	2688	0.90823	0.425307	1.39115	0.246281	0.000230751		1756	1.35469	0.755395	1.95398	0.305554	9.85026e-06		931	0.807212	-0.012912	1.62734	0.417882	0.0537098		1173	1.11124	0.355606	1.86687	0.385128	0.00398235
Abbrevations: AN = anorexia nervosa, Beta = beta estimate/effect size from linear regression, BMI = body mass index, ED = eating disorder, N = number of participants, P-value = p-value of regression coefficient, Pt = p value threshold, SCZ = schizophrenia, SE = standard error

## Sheet: ST 5 AN PGS logistic SEED
Supplementary Table 5. Odds ratio (OR) per standard deviation anorexia nervosa polygenic score (PGS) on severe and enduring eating disorder in either full anorexia nervoisa with other eating disorder (ED), only anorexia nervosa (AN), or only anorexia nervosa restricting subtype (ANR) sample. Polygenic risk scores (PGSs) were generated from SNPs associated with lifetime anorexia nervosa (AN) at P-…
Model 1: Principal components 1-10, treatment region. Model 2: Same as model 1 and age. Model 3 (main model): Same as model 2, sex and eating disorder diagnosis. Model 4: Same as model 3 and BMI. Model 5: Same as model 4 and age at eating disorder diagnosis.
N - number of that in model 4 and 5 fewer individuals are included due to missing data on BMI and age at eating disorder onset.
Additional eating disorder diagnosis to anorexia nervosa (AN) was only included in the model when analysing the full dataset (N = 2,843).																													Additional eating disorder diagnosis to anorexia nervosa (AN) was only included in the model when analysing the full dataset (N = 2,843).																Additional eating disorder diagnosis to anorexia nervosa (AN) was only included in the model when analysing the full dataset (N = 2,843).
		Full sample with mixed eating disorder (ED) presentation					Sample with anorexia nervosa (AN) diagnosis					Sample with anorexia nervosa restricting (ANR) subtype					Sample with low-weight (BMI ≤ 17.5) anorexia nervosa
AN PGS P-value threshold from the discrovery dataset	Models	N (SEED vs non-SEED)	OR	95%CI low	CI95% up	P-value	N (SEED vs non-SEED)	OR	95%CI low	CI95% up	P-value	N (SEED vs non-SEED)	OR	95%CI low	CI95% up	P-value	N (SEED vs non-SEED)	OR	95%CI low	CI95% up	P-value
Pt < 5e08	Model 1	528 / 806	0.965304	0.863791	1.07697	0.529787	337 / 564	1.02621	0.900355	1.16767	0.695893	178 / 331	0.916463	0.764036	1.09156	0.336106	229 / 374	0.931403	0.785045	1.09938	0.406661
	Model 2	528 / 806	0.967867	0.865818	1.08017	0.562246	337 / 564	1.02699	0.900847	1.16883	0.687975	178 / 331	0.91006	0.757769	1.08513	0.301835	229 / 374	0.935464	0.788035	1.10491	0.437616
	Model 3	528 / 806	0.975785	0.871899	1.0903	0.666903	337 / 564	1.02965	0.902823	1.17243	0.660526	178 / 331	0.910774	0.758388	1.086	0.305848	229 / 374	0.938928	0.790517	1.10982	0.465099
	Model 4	528 / 806	0.984267	0.879072	1.10033	0.781597	337 / 564	1.03939	0.910686	1.18458	0.563961	178 / 331	0.929404	0.773161	1.1099	0.425546	229 / 374	0.939314	0.790877	1.11033	0.468014
	Model 5	485 / 756	0.979013	0.870288	1.09943	0.721679	316 / 535	1.03094	0.898702	1.18056	0.660886	168 / 316	0.889836	0.732377	1.07181	0.227781	212 / 350	0.92953	0.773256	1.11078	0.427384
Pt < 1e05	Model 1	528 / 806	1.00616	0.901162	1.12241	0.912633	337 / 564	1.11356	0.977336	1.26858	0.105356	178 / 331	1.0112	0.844922	1.20615	0.902083	229 / 374	1.05038	0.891112	1.23672	0.555531
	Model 2	528 / 806	1.00597	0.900757	1.1225	0.915443	337 / 564	1.11238	0.976053	1.26756	0.10952	178 / 331	1.0011	0.83493	1.19586	0.990363	229 / 374	1.04845	0.888848	1.23521	0.571982
	Model 3	528 / 806	1.01234	0.901118	1.13088	0.828549	337 / 564	1.11217	0.975469	1.26789	0.111338	178 / 331	0.998259	0.83235	1.19276	0.984803	229 / 374	1.04869	0.888309	1.23667	0.572174
	Model 4	528 / 806	1.01955	0.911602	1.13936	0.733291	337 / 564	1.11901	0.981177	1.27622	0.0930398	178 / 331	1.01648	0.847102	1.21588	0.85885	229 / 374	1.04755	0.887316	1.23544	0.581196
	Model 5	485 / 756	1.01136	0.900392	1.13492	0.848145	316 / 535	1.11463	0.973488	1.27592	0.115185	168 / 316	0.982442	0.813907	1.18079	0.851493	212 / 350	1.04011	0.873747	1.23592	0.655743
Pt < 0.001	Model 1	528 / 806	1.08573	0.972537	1.21264	0.143635	337 / 564	1.22663	1.0693	1.40945	0.00370484	178 / 331	1.25609	1.03828	1.52405	0.0196327	229 / 374	1.1116	0.938299	1.31852	0.222062
	Model 2	528 / 806	1.09112	0.9771	1.219	0.121978	337 / 564	1.22819	1.07045	1.41153	0.00354474	178 / 331	1.25644	1.03795	1.52528	0.0198394	229 / 374	1.11799	0.943005	1.32701	0.199881
	Model 3	528 / 806	1.10627	0.989023	1.23805	0.0777105	337 / 564	1.24056	1.08022	1.42719	0.00239005	178 / 331	1.2567	1.03806	1.52581	0.0198024	229 / 374	1.13339	0.954309	1.348	0.154604
	Model 4	528 / 806	1.10097	0.983658	1.23288	0.0947574	337 / 564	1.23181	1.07178	1.41815	0.00348187	178 / 331	1.2497	1.02951	1.52133	0.0249615	229 / 374	1.13207	0.953063	1.34658	0.158805
	Model 5	485 / 756	1.08781	0.967092	1.2241	0.161186	316 / 535	1.21565	1.053	1.40576	0.00798979	168 / 316	1.20992	0.991653	1.47973	0.0614321	212 / 350	1.08518	0.904538	1.30283	0.378934
Pt < 0.01	Model 1	528 / 806	0.993196	0.887482	1.1114	0.905256	337 / 564	1.04347	0.908358	1.19905	0.547554	178 / 331	1.02878	0.856756	1.23556	0.760871	229 / 374	0.950459	0.802668	1.12476	0.554349
	Model 2	528 / 806	0.992583	0.88677	1.1109	0.89689	337 / 564	1.04019	0.905233	1.19558	0.5784	178 / 331	1.01865	0.847388	1.2245	0.843745	229 / 374	0.946808	0.798991	1.12119	0.526477
	Model 3	528 / 806	1.00032	0.892352	1.12135	0.995591	337 / 564	1.04632	0.910251	1.20312	0.524135	178 / 331	1.02012	0.848636	1.22624	0.831724	229 / 374	0.9555	0.805927	1.13215	0.599012
	Model 4	528 / 806	1.00342	0.894644	1.12543	0.953493	337 / 564	1.04879	0.911831	1.2067	0.504728	178 / 331	1.0253	0.851546	1.23463	0.79165	229 / 374	0.955082	0.805508	1.13176	0.595692
	Model 5	485 / 756	1.00501	0.891358	1.13313	0.934886	316 / 535	1.05078	0.908815	1.21543	0.503772	168 / 316	1.01784	0.840695	1.23222	0.855907	212 / 350	0.943147	0.788663	1.12697	0.519644
Pt < 0.05	Model 1	528 / 806	0.985123	0.880437	1.10212	0.793453	337 / 564	0.989471	0.86165	1.13613	0.880603	178 / 331	1.01209	0.842958	1.21489	0.897276	229 / 374	0.961319	0.810999	1.1386	0.648014
	Model 2	528 / 806	0.987349	0.882301	1.10478	0.824231	337 / 564	0.988788	0.860879	1.13557	0.873055	178 / 331	1.01547	0.845296	1.21966	0.869348	229 / 374	0.963272	0.812172	1.14156	0.666052
	Model 3	528 / 806	0.99098	0.884063	1.11077	0.876262	337 / 564	0.995061	0.866063	1.14319	0.944202	178 / 331	1.02024	0.849068	1.22574	0.83028	229 / 374	0.97003	0.817627	1.15001	0.726147
	Model 4	528 / 806	0.992752	0.885205	1.11332	0.900957	337 / 564	0.997636	0.8679	1.14672	0.973397	178 / 331	1.02994	0.855786	1.2397	0.754526	229 / 374	0.969814	0.817433	1.14982	0.724278
	Model 5	485 / 756	0.986647	0.875063	1.11233	0.826016	316 / 535	0.972622	0.841372	1.12402	0.706813	168 / 316	1.01554	0.838804	1.2291	0.87402	212 / 350	0.954794	0.798163	1.14105	0.611232
Pt < 0.1	Model 1	528 / 806	0.985801	0.881428	1.1025	0.802063	337 / 564	0.971261	0.846032	1.11489	0.678393	178 / 331	0.958477	0.796615	1.15255	0.652011	229 / 374	0.954835	0.805897	1.13063	0.591987
	Model 2	528 / 806	0.988086	0.883302	1.10528	0.833891	337 / 564	0.97128	0.845916	1.11509	0.678944	178 / 331	0.961008	0.798276	1.1562	0.673238	229 / 374	0.954971	0.805599	1.13131	0.594182
	Model 3	528 / 806	0.994372	0.887542	1.11412	0.922435	337 / 564	0.974614	0.848681	1.11912	0.71527	178 / 331	0.964792	0.801403	1.16082	0.703974	229 / 374	0.960381	0.810153	1.13779	0.640243
	Model 4	528 / 806	0.997074	0.889407	1.11786	0.959905	337 / 564	0.975601	0.848888	1.12113	0.727483	178 / 331	0.964792	0.808256	1.17628	0.792493	229 / 374	0.960017	0.809813	1.13743	0.637213
	Model 5	485 / 756	0.996433	0.88418	1.12301	0.953249	316 / 535	0.957784	0.828832	1.10648	0.557955	168 / 316	0.965792	0.796776	1.16991	0.721862	212 / 350	0.947437	0.792824	1.1313	0.550913
Pt < 0.2	Model 1	528 / 806	0.982528	0.877079	1.10061	0.760702	337 / 564	0.966939	0.841093	1.1115	0.636033	178 / 331	0.983529	0.817639	1.18293	0.859803	229 / 374	0.985696	0.831552	1.16833	0.867879
	Model 2	528 / 806	0.983226	0.877544	1.1016	0.770426	337 / 564	0.965206	0.83942	1.10971	0.618605	178 / 331	0.985373	0.818566	1.18601	0.875963	229 / 374	0.981044	0.82708	1.16346	0.825712
	Model 3	528 / 806	0.993088	0.884864	1.11463	0.906172	337 / 564	0.970376	0.843803	1.11583	0.672809	178 / 331	0.989464	0.821984	1.19093	0.910659	229 / 374	0.990271	0.834761	1.17463	0.910512
	Model 4	528 / 806	0.997487	0.888245	1.12028	0.966076	337 / 564	0.97575	0.847783	1.12298	0.731835	178 / 331	1.00538	0.833408	1.21309	0.955241	229 / 374	0.989401	0.834013	1.17363	0.902519
	Model 5	485 / 756	0.999363	0.885368	1.12817	0.991765	316 / 535	0.96484	0.834303	1.11559	0.628765	168 / 316	0.999656	0.825532	1.21062	0.99718	212 / 350	0.98652	0.826046	1.17807	0.88066
Pt < 0.3	Model 1	528 / 806	0.971404	0.866772	1.08854	0.617379	337 / 564	0.960116	0.835086	1.10367	0.566827	178 / 331	0.970922	0.808014	1.1664	0.752228	229 / 374	0.960491	0.809665	1.13902	0.642844
	Model 2	528 / 806	0.973742	0.868683	1.09141	0.647442	337 / 564	0.959723	0.834585	1.10343	0.563449	178 / 331	0.973426	0.809471	1.17033	0.774166	229 / 374	0.958565	0.807552	1.13736	0.627552
	Model 3	528 / 806	0.983785	0.876112	1.10473	0.782105	337 / 564	0.966271	0.840124	1.1112	0.630187	178 / 331	0.973426	0.814358	1.17792	0.825528	229 / 374	0.969725	0.816773	1.15096	0.72489
	Model 4	528 / 806	0.987644	0.878982	1.1098	0.834311	337 / 564	0.971017	0.843544	1.11765	0.681673	178 / 331	0.992318	0.823261	1.19624	0.935395	229 / 374	0.969261	0.816398	1.15041	0.720772
	Model 5	485 / 756	0.991607	0.877856	1.12017	0.892105	316 / 535	0.958186	0.828182	1.10819	0.564918	168 / 316	0.997623	0.823677	1.2083	0.980539	212 / 350	0.967139	0.808403	1.15651	0.714072
Pt < 0.4	Model 1	528 / 806	0.963008	0.859821	1.07841	0.513908	337 / 564	0.962051	0.837627	1.10483	0.583486	178 / 331	0.982878	0.819378	1.17903	0.852146	229 / 374	0.968792	0.817715	1.14753	0.713349
	Model 2	528 / 806	0.965407	0.861803	1.08132	0.542781	337 / 564	0.961217	0.836757	1.10406	0.575535	178 / 331	0.985108	0.820689	1.18252	0.871832	229 / 374	0.96683	0.815599	1.14581	0.696829
	Model 3	528 / 806	0.976037	0.86982	1.09522	0.679667	337 / 564	0.967922	0.842425	1.11202	0.644952	178 / 331	0.991568	0.825841	1.19068	0.927575	229 / 374	0.978448	0.825116	1.16009	0.801766
	Model 4	528 / 806	0.979464	0.872321	1.09978	0.725381	337 / 564	0.972415	0.84567	1.11812	0.694291	178 / 331	1.00478	0.835013	1.20958	0.959669	229 / 374	0.978117	0.824859	1.15969	0.798729
	Model 5	485 / 756	0.986272	0.87371	1.11339	0.822994	316 / 535	0.960964	0.831236	1.11064	0.589714	168 / 316	1.01715	0.841194	1.23044	0.860584	212 / 350	0.97927	0.819293	1.17024	0.817536
Pt < 0.5	Model 1	528 / 806	0.965885	0.86227	1.0818	0.548295	337 / 564	0.968907	0.843583	1.11282	0.654532	178 / 331	0.990071	0.8253	1.18793	0.914319	229 / 374	0.977398	0.824854	1.15805	0.791359
	Model 2	528 / 806	0.968682	0.864612	1.08516	0.58276	337 / 564	0.968938	0.843486	1.11303	0.655219	178 / 331	0.993851	0.827922	1.1933	0.947169	229 / 374	0.97642	0.823602	1.15748	0.783084
	Model 3	528 / 806	0.979338	0.872639	1.09911	0.72262	337 / 564	0.976335	0.849683	1.12189	0.735236	178 / 331	1.00058	0.833245	1.20187	0.995015	229 / 374	0.989467	0.83418	1.17367	0.903086
	Model 4	528 / 806	0.983554	0.875845	1.10456	0.779188	337 / 564	0.980989	0.853084	1.12816	0.787554	178 / 331	1.01386	0.842558	1.2207	0.884042	229 / 374	0.989086	0.833887	1.1732	0.899567
	Model 5	485 / 756	0.992214	0.878844	1.12031	0.899483	316 / 535	0.973284	0.841943	1.125	0.713877	168 / 316	1.02776	0.850106	1.24332	0.777236	212 / 350	0.992426	0.830246	1.18626	0.933326
Pt < 1	Model 1	528 / 806	0.96866	0.865105	1.08451	0.580535	337 / 564	0.971745	0.846695	1.1153	0.683145	178 / 331	0.994211	0.829218	1.19248	0.94996	229 / 374	0.981186	0.828689	1.16178	0.825324
	Model 2	528 / 806	0.971022	0.867056	1.08739	0.610454	337 / 564	0.971431	0.846293	1.11512	0.68011	178 / 331	0.99729	0.831275	1.19696	0.976681	229 / 374	0.979521	0.826838	1.16042	0.810566
	Model 3	528 / 806	0.980812	0.874373	1.10028	0.740861	337 / 564	0.979217	0.852814	1.12445	0.76567	178 / 331	1.00408	0.836657	1.20559	0.965061	229 / 374	0.993183	0.83792	1.17738	0.937066
	Model 4	528 / 806	0.985884	0.878343	1.10669	0.809305	337 / 564	0.984601	0.856855	1.13156	0.826656	178 / 331	1.01802	0.846554	1.22516	0.849535	229 / 374	0.992811	0.837627	1.17693	0.933614
	Model 5	485 / 756	0.992363	0.879219	1.12021	0.901196	316 / 535	0.97463	0.843643	1.12587	0.726749	168 / 316	1.02922	0.851442	1.24506	0.765914	212 / 350	0.996269	0.833859	1.19039	0.96711
Abbrevations: AN = anorexia nervosa, CI = confidence interval, OR = odds ratio/effect size from logistic regression, BMI = body mass index, ED = eating disorder, N = number of participants, P-value = p-value of regression coefficient, Pt = p value threshold, SCZ = schizophrenia, SE = standard error

## Sheet: ST 6 PRSC logistic
Supplementary Table 6. Odds ratio (OR) per standard deviation of polygenic score created by the polygenic risk score continues shrinkage (PRS-CS) methods on the outcome severe and enduring eating disorder (SEED) defined as a total Clinical Impairment Assessment (CIA) score above 18 points and a follow-up duration in the Swedish registers of more than 5 years. We performed 3 different analysis wit…
		Full sample with mixed eating disorder (ED) presenation					Sample with anorexia nervosa (AN) diagnosis					Sample with anorexia nervosa restricting (ANR) subtype					Sample with low-weight (BMI ≤ 17.5) anorexia nervosa
AN PGS P-value threshold from the discrovery dataset	Models	N (SEED vs non-SEED)	OR	95% CI low	95% CI upper	P-value	N (SEED vs non-SEED)	OR	95% CI low	95% CI upper	P-value	N (SEED vs non-SEED)	OR	95% CI low	95% CI upper	P-value	N (SEED vs non-SEED)	OR	95% CI low	95% CI upper	P-value
	Model 1	528 / 806	0.97	0.87	1.09	0.66	337 / 564	1.02	0.89	1.17	0.75	178 / 331	0.99	0.82	1.19	0.89	229 / 374	0.991047	0.837135	1.17283	0.916596
	Model 2	528 / 806	0.98	0.87	1.09	0.66	337 / 564	1.02	0.89	1.17	0.8	178 / 331	0.97	0.81	1.18	0.79	229 / 374	0.990833	0.836513	1.17314	0.914859
	Model 3	528 / 806	0.98	0.87	1.1	0.7	337 / 564	1.02	0.89	1.17	0.76	178 / 331	0.98	0.81	1.18	0.81	229 / 374	1.00115	0.84412	1.18708	0.989452
	Model 4	528 / 806	0.98	0.87	1.1	0.73	337 / 564	1.03	0.89	1.18	0.7	178 / 331	0.99	0.82	1.2	0.94	229 / 374	0.999147	0.842376	1.1848	0.992164
	Model 5	485 / 756	0.99	0.87	1.11	0.81	316 / 535	1.01	0.88	1.17	0.86	168 / 316	0.94	0.77	1.15	0.55	212 / 350	0.996687	0.83296	1.19241	0.971024
SCZ PGS P-value threshold from the discrovery dataset	Models	N (SEED vs non-SEED)	OR	Conf low	Conf high	P-value	N (SEED vs non-SEED)	OR	Conf low	Conf high	P-value	N (SEED vs non-SEED)	OR	Conf low	Conf high	P-value	N (SEED vs non-SEED)	OR	Conf low	Conf high	P-value
	Model 1	528 / 806	0.98	0.87	1.09	0.72	337 / 564	0.98	0.85	1.13	0.79	178 / 331	1.05	0.87	1.27	0.58	229 / 374	1.10253	0.932379	1.30571	0.255088
	Model 2	528 / 806	0.98	0.87	1.1	0.73	337 / 564	0.98	0.85	1.13	0.79	178 / 331	1.05	0.87	1.27	0.6	229 / 374	1.10194	0.93126	1.30581	0.259502
	Model 3	528 / 806	0.99	0.88	1.11	0.86	337 / 564	0.99	0.86	1.14	0.87	178 / 331	1.05	0.87	1.28	0.59	229 / 374	1.11763	0.94332	1.32637	0.200056
	Model 4	528 / 806	0.99	0.88	1.11	0.87	337 / 564	0.98	0.85	1.13	0.82	178 / 331	1.05	0.87	1.28	0.61	229 / 374	1.1189	0.944307	1.328	0.195769
	Model 5	485 / 756	0.98	0.87	1.11	0.79	316 / 535	0.99	0.85	1.15	0.93	168 / 316	1.05	0.86	1.28	0.65	212 / 350	1.14232	0.950786	1.37583	0.157327
BMI PGS P-value threshold from the discrovery dataset	Models	N (SEED vs non-SEED)	OR	Conf low	Conf high	P-value	N (SEED vs non-SEED)	OR	Conf low	Conf high	P-value	N (SEED vs non-SEED)	OR	Conf low	Conf high	P-value	N (SEED vs non-SEED)	OR	Conf low	Conf high	P-value
	Model 1	528 / 806	1.08	0.97	1.21	0.18	337 / 564	1.1	0.96	1.26	0.18	178 / 331	1.08	0.89	1.31	0.44	229 / 374	1.1742	0.99034	1.39482	0.0656179
	Model 2	528 / 806	1.08	0.96	1.2	0.2	337 / 564	1.1	0.96	1.26	0.19	178 / 331	1.07	0.89	1.3	0.47	229 / 374	1.16545	0.982389	1.3852	0.0802181
	Model 3	528 / 806	1.09	0.97	1.22	0.15	337 / 564	1.1	0.96	1.26	0.17	178 / 331	1.08	0.89	1.31	0.44	229 / 374	1.17384	0.988848	1.39621	0.0681294
	Model 4	528 / 806	1.08	0.97	1.21	0.18	337 / 564	1.11	0.97	1.27	0.14	178 / 331	1.1	0.91	1.34	0.33	229 / 374	1.18206	0.994824	1.40756	0.0584628
	Model 5	485 / 756	1.11	0.98	1.25	0.09	316 / 535	1.12	0.97	1.3	0.11	168 / 316	1.08	0.88	1.33	0.44	212 / 350	1.20768	1.00692	1.45224	0.0430506
Abbrevations: AN = anorexia nervosa, CI = confidence interval, OR = odds ratio/effect size from logistic regression, BMI = body mass index, ED = eating disorder, N = number of participants, P-value = p-value of regression coefficient, SCZ = schizophrenia, SE = standard error

## Sheet: ST 7 SCZ PGS logistic SEED
Supplementary Table 7. Odds ratio (OR) per standard deviation schizohrenia (SCZ) polygenic score (PGS) on severe and enduring eating disorder in either full anorexia nervoisa with other eating disorder (ED), only anorexia nervosa (AN), or only anorexia nervosa restricting subtype (ANR) sample. Polygenic risk scores (PGSs) were generated from SNPs associated with lifetime schizophrenia (SCZ) at P-…
Model 1: Principal components 1-10, treatment region. Model 2: Same as model 1 and age. Model 3 (main model): Same as model 2, sex and eating disorder diagnosis. Model 4: Same as model 3 and BMI. Model 5: Same as model 4 and age at eating disorder diagnosis.
N - number of that in model 4 and 5 fewer individuals are included due to missing data on BMI and age at eating disorder onset.
Additional eating disorder diagnosis to anorexia nervosa (AN) was only included in the model when analysing the full dataset (N = 2,843).																													Additional eating disorder diagnosis to anorexia nervosa (AN) was only included in the model when analysing the full dataset (N = 2,843).																Additional eating disorder diagnosis to anorexia nervosa (AN) was only included in the model when analysing the full dataset (N = 2,843).
		Full sample with mixed eating disorder (ED) presentation					Sample with anorexia nervosa (AN) diagnosis					Sample with anorexia nervosa restricting (ANR) subtype					Sample with low-weight (BMI ≤ 17.5) anorexia nervosa
SCZ PGS P-value threshold from the discrovery dataset	Models	N (SEED vs non-SEED)	OR	95%CI low	CI95% up	P-value	N (SEED vs non-SEED)	OR	95%CI low	CI95% up	P-value	N (SEED vs non-SEED)	OR	95%CI low	CI95% up	P-value	N (SEED vs non-SEED)	OR	95%CI low	CI95% up	P-value
Pt < 5e08	Model 1	528 / 806	0.907293	0.808485	1.01841	0.0981307	337 / 564	0.924535	0.80041	1.06905	0.286945	178 / 331	1.00012	0.823791	1.21982	0.999058	229 / 374	1.04744	0.873516	1.26042	0.619418
	Model 2	528 / 806	0.909787	0.810511	1.01841	0.108734	337 / 564	0.925161	0.800765	1.06999	0.291853	178 / 331	0.99063	0.814879	1.20995	0.925385	229 / 374	1.04117	0.867342	1.25409	0.667219
	Model 3	528 / 806	0.912457	0.811684	1.02593	0.124816	337 / 564	0.929124	0.804021	1.07481	0.319899	178 / 331	0.995997	0.819217	1.21657	0.968183	229 / 374	1.05298	0.876963	1.26868	0.582751
	Model 4	528 / 806	0.905412	0.804704	1.01879	0.0983251	337 / 564	0.925156	0.799867	1.07109	0.295368	178 / 331	0.998136	0.818789	1.22276	0.985407	229 / 374	1.05688	0.879936	1.27383	0.556786
	Model 5	485 / 756	0.894677	0.790302	1.01284	0.0783319	316 / 535	0.894863	0.768155	1.04336	0.154253	168 / 316	0.96874	0.789013	1.19432	0.763252	212 / 350	1.0463	0.863719	1.27184	0.645779
Pt < 1e05	Model 1	528 / 806	0.896281	0.798307	1.00614	0.0633443	337 / 564	0.916669	0.793987	1.05861	0.235074	178 / 331	0.984931	0.814653	1.19342	0.875821	229 / 374	1.00584	0.844128	1.20022	0.948176
	Model 2	528 / 806	0.898545	0.800075	1.00901	0.0704411	337 / 564	0.916468	0.793577	1.05867	0.23483	178 / 331	0.976257	0.806545	1.18428	0.805825	229 / 374	0.998241	0.836823	1.19227	0.984417
	Model 3	528 / 806	0.902419	0.802336	1.01486	0.0864522	337 / 564	0.920682	0.79716	1.06362	0.260629	178 / 331	0.977829	0.808074	1.18576	0.818298	229 / 374	1.00545	0.842704	1.20113	0.951932
	Model 4	528 / 806	0.8939	0.794055	1.00607	0.0629526	337 / 564	0.914444	0.791052	1.05726	0.226144	178 / 331	0.985912	0.812673	1.19893	0.885997	229 / 374	1.00895	0.845404	1.20568	0.92149
	Model 5	485 / 756	0.88152	0.778801	0.997397	0.045487	316 / 535	0.89975	0.773513	1.04668	0.170305	168 / 316	0.962344	0.788863	1.17577	0.705444	212 / 350	1.01218	0.841522	1.21896	0.897872
Pt < 0.001	Model 1	528 / 806	0.931031	0.82651	1.0485	0.238637	337 / 564	0.896654	0.773505	1.03857	0.146327	178 / 331	0.950191	0.784096	1.15081	0.600985	229 / 374	0.959942	0.802376	1.14816	0.654208
	Model 2	528 / 806	0.932252	0.827313	1.05018	0.248612	337 / 564	0.897072	0.773683	1.03931	0.148715	178 / 331	0.943868	0.778048	1.1442	0.556343	229 / 374	0.956122	0.798472	1.14449	0.624607
	Model 3	528 / 806	0.933768	0.82723	1.05365	0.266489	337 / 564	0.896243	0.772382	1.03911	0.14733	178 / 331	0.93815	0.773018	1.13763	0.516368	229 / 374	0.957375	0.799003	1.14673	0.635957
	Model 4	528 / 806	0.924643	0.818556	1.04407	0.206548	337 / 564	0.891037	0.767285	1.03384	0.128948	178 / 331	0.939939	0.772545	1.14272	0.5343	229 / 374	0.9593	0.800558	1.14912	0.651727
	Model 5	485 / 756	0.908368	0.799063	1.03191	0.140375	316 / 535	0.877505	0.750416	1.02494	0.100005	168 / 316	0.921303	0.752391	1.12657	0.425126	212 / 350	0.971049	0.803733	1.17274	0.760121
Pt < 0.01	Model 1	528 / 806	0.961884	0.848861	1.0898	0.541779	337 / 564	0.948897	0.814546	1.10506	0.499778	178 / 331	0.887611	0.723533	1.08729	0.250345	229 / 374	0.943778	0.786588	1.13187	0.532473
	Model 2	528 / 806	0.960807	0.847597	1.0889	0.531259	337 / 564	0.950957	0.816086	1.1077	0.518342	178 / 331	0.883492	0.719113	1.08361	0.235469	229 / 374	0.941542	0.784085	1.12995	0.517519
	Model 3	528 / 806	0.966108	0.850885	1.09671	0.594062	337 / 564	0.951158	0.815991	1.1083	0.520995	178 / 331	0.882552	0.71829	1.08251	0.23161	229 / 374	0.947687	0.78889	1.13783	0.56463
	Model 4	528 / 806	0.955325	0.840991	1.08491	0.481421	337 / 564	0.93781	0.804054	1.09327	0.412182	178 / 331	0.863791	0.70157	1.06133	0.164805	229 / 374	0.946674	0.787933	1.13676	0.557205
	Model 5	485 / 756	0.925612	0.809144	1.05822	0.258457	316 / 535	0.927654	0.790337	1.08796	0.356447	168 / 316	0.873379	0.70157	1.07962	0.212136	212 / 350	0.920801	0.759673	1.1149	0.398382
Pt < 0.05	Model 1	528 / 806	0.930152	0.814794	1.06142	0.28273	337 / 564	0.923124	0.784283	1.08576	0.334484	178 / 331	0.854383	0.686832	1.06056	0.154861	229 / 374	0.93062	0.768217	1.12653	0.460833
	Model 2	528 / 806	0.932985	0.817026	1.06497	0.304544	337 / 564	0.925851	0.786429	1.08918	0.353215	178 / 331	0.854606	0.686244	1.06189	0.157553	229 / 374	0.931571	0.768536	1.12834	0.468607
	Model 3	528 / 806	0.942055	0.823724	1.07697	0.382389	337 / 564	0.924331	0.784761	1.08786	0.344384	178 / 331	0.851403	0.683375	1.05828	0.148585	229 / 374	0.934222	0.770342	1.13211	0.487735
	Model 4	528 / 806	0.937376	0.819358	1.07195	0.3451	337 / 564	0.92069	0.781425	1.08387	0.321593	178 / 331	0.841404	0.674155	1.04741	0.123762	229 / 374	0.933363	0.76949	1.13126	0.482271
	Model 5	485 / 756	0.906313	0.785512	1.04493	0.176242	316 / 535	0.910758	0.766287	1.08115	0.286483	168 / 316	0.873031	0.693402	1.09657	0.244544	212 / 350	0.917392	0.747162	1.12479	0.407813
Pt < 0.1	Model 1	528 / 806	0.934883	0.815735	1.07097	0.331897	337 / 564	0.937177	0.795613	1.1033	0.436091	178 / 331	0.880804	0.703458	1.10061	0.265387	229 / 374	0.949186	0.78038	1.15399	0.600657
	Model 2	528 / 806	0.936376	0.816804	1.07299	0.34451	337 / 564	0.939537	0.797441	1.10634	0.45472	178 / 331	0.881611	0.703535	1.10255	0.270621	229 / 374	0.948753	0.779551	1.15417	0.598619
	Model 3	528 / 806	0.940256	0.818922	1.07907	0.381019	337 / 564	0.94256	0.799599	1.11046	0.479634	178 / 331	0.880683	0.702499	1.10182	0.267491	229 / 374	0.957847	0.786382	1.1663	0.667882
	Model 4	528 / 806	0.940649	0.818982	1.07989	0.385437	337 / 564	0.945495	0.801722	1.11446	0.504245	178 / 331	0.874134	0.702499	1.0956	0.244392	229 / 374	0.956207	0.784817	1.16457	0.655916
	Model 5	485 / 756	0.919778	0.794258	1.06449	0.262568	316 / 535	0.944722	0.794568	1.12256	0.518364	168 / 316	0.91735	0.72415	1.16033	0.47224	212 / 350	0.951644	0.770974	1.17398	0.643411
Pt < 0.2	Model 1	528 / 806	0.965195	0.844157	1.10329	0.603704	337 / 564	0.947577	0.806697	1.1125	0.5109	178 / 331	0.885675	0.709459	1.10315	0.280052	229 / 374	0.956931	0.787857	1.16162	0.656174
	Model 2	528 / 806	0.966712	0.845231	1.10537	0.620643	337 / 564	0.949521	0.808119	1.11513	0.527888	178 / 331	0.883756	0.707229	1.10185	0.273688	229 / 374	0.956726	0.787132	1.16225	0.655815
	Model 3	528 / 806	0.96863	0.845447	1.10942	0.645417	337 / 564	0.952562	0.810207	1.1194	0.555191	178 / 331	0.882437	0.705712	1.10088	0.269279	229 / 374	0.96299	0.791497	1.17107	0.705438
	Model 4	528 / 806	0.971535	0.847729	1.11309	0.677416	337 / 564	0.953797	0.810775	1.12152	0.567201	178 / 331	0.86944	0.693647	1.08692	0.221172	229 / 374	0.959554	0.788323	1.16732	0.679635
	Model 5	485 / 756	0.947063	0.820138	1.09313	0.457689	316 / 535	0.940217	0.793606	1.11328	0.474747	168 / 316	0.892745	0.707885	1.12352	0.334637	212 / 350	0.940612	0.764378	1.15685	0.561753
Pt < 0.3	Model 1	528 / 806	0.966601	0.846702	1.10314	0.614485	337 / 564	0.92944	0.7921	1.08979	0.368085	178 / 331	0.863468	0.688618	1.0798	0.199928	229 / 374	0.941128	0.77332	1.14452	0.543407
	Model 2	528 / 806	0.969181	0.848746	1.1064	0.643203	337 / 564	0.93298	0.794918	1.09426	0.394296	178 / 331	0.861983	0.68688	1.07877	0.196259	229 / 374	0.943271	0.774631	1.14785	0.559826
	Model 3	528 / 806	0.969561	0.847742	1.10854	0.651193	337 / 564	0.937139	0.798087	1.09967	0.426679	178 / 331	0.863488	0.687775	1.08113	0.202439	229 / 374	0.949309	0.778878	1.15632	0.605209
	Model 4	528 / 806	0.968328	0.846278	1.1076	0.638935	337 / 564	0.93299	0.79384	1.09571	0.398296	178 / 331	0.839262	0.666166	1.05393	0.133527	229 / 374	0.94475	0.774669	1.15136	0.57332
	Model 5	485 / 756	0.954073	0.828446	1.09823	0.512906	316 / 535	0.93161	0.787884	1.10069	0.405616	168 / 316	0.88994	0.703218	1.12382	0.328534	212 / 350	0.94904	0.77088	1.16795	0.621014
Pt < 0.4	Model 1	528 / 806	0.999051	0.877357	1.13759	0.988565	337 / 564	0.966184	0.825662	1.13031	0.667308	178 / 331	0.900479	0.721319	1.12224	0.351599	229 / 374	0.981227	0.808276	1.19116	0.847828
	Model 2	528 / 806	1.00249	0.880142	1.14185	0.970135	337 / 564	0.970247	0.828916	1.13542	0.706384	178 / 331	0.901702	0.721853	1.12451	0.359255	229 / 374	0.984555	0.810566	1.19596	0.875148
	Model 3	528 / 806	1.00305	0.879287	1.14423	0.963771	337 / 564	0.972563	0.830523	1.13864	0.729345	178 / 331	0.901673	0.72157	1.12485	0.359854	229 / 374	0.988868	0.813581	1.20204	0.910344
	Model 4	528 / 806	1.00379	0.879402	1.14573	0.955258	337 / 564	0.968139	0.825956	1.13446	0.688878	178 / 331	0.875807	0.698258	1.09604	0.248	229 / 374	0.984996	0.810015	1.1978	0.879393
	Model 5	485 / 756	0.980238	0.853354	1.12581	0.777481	316 / 535	0.960786	0.815242	1.13197	0.632416	168 / 316	0.916655	0.727633	1.1534	0.458037	212 / 350	0.985603	0.803755	1.20906	0.889076
Pt < 0.5	Model 1	528 / 806	0.985154	0.864767	1.12215	0.821821	337 / 564	0.947488	0.809127	1.10897	0.501895	178 / 331	0.897789	0.717653	1.12098	0.342298	229 / 374	0.954944	0.785716	1.16021	0.642335
	Model 2	528 / 806	0.989526	0.868346	1.12752	0.874344	337 / 564	0.951809	0.812574	1.11443	0.539497	178 / 331	0.897898	0.717115	1.12213	0.344768	229 / 374	0.957868	0.787626	1.16455	0.6656
	Model 3	528 / 806	0.992261	0.869439	1.13231	0.908156	337 / 564	0.95387	0.814054	1.11722	0.558252	178 / 331	0.897644	0.716736	1.12206	0.34399	229 / 374	0.961261	0.790017	1.16929	0.692356
	Model 4	528 / 806	0.993893	0.870306	1.13489	0.927864	337 / 564	0.950523	0.810304	1.11446	0.532099	178 / 331	0.871487	0.693093	1.09301	0.235569	229 / 374	0.957019	0.786129	1.16463	0.660734
	Model 5	485 / 756	0.973715	0.847287	1.11876	0.706931	316 / 535	0.950577	0.806189	1.12034	0.545508	168 / 316	0.919107	0.728175	1.15849	0.475407	212 / 350	0.967687	0.788479	1.18767	0.752833
Pt < 1	Model 1	528 / 806	0.959096	0.843379	1.09042	0.523669	337 / 564	0.910033	0.778863	1.06247	0.233512	178 / 331	0.879177	0.705248	1.09366	0.249033	229 / 374	0.917048	0.755648	1.11212	0.37898
	Model 2	528 / 806	0.963622	0.847124	1.09591	0.572392	337 / 564	0.913797	0.781907	1.06716	0.255396	178 / 331	0.880798	0.706246	1.09624	0.256887	229 / 374	0.920517	0.758063	1.11706	0.401619
	Model 3	528 / 806	0.964021	0.84618	1.09798	0.581096	337 / 564	0.916833	0.784289	1.071	0.274139	178 / 331	0.88165	0.706983	1.09721	0.260355	229 / 374	0.925738	0.762206	1.12365	0.435046
	Model 4	528 / 806	0.965135	0.846457	1.10014	0.595383	337 / 564	0.912909	0.779823	1.06786	0.255324	178 / 331	0.857424	0.684589	1.07113	0.17714	229 / 374	0.921117	0.757984	1.1186	0.407122
	Model 5	485 / 756	0.956635	0.833966	1.09703	0.525856	316 / 535	0.91689	0.779107	1.07828	0.294723	168 / 316	0.907302	0.721087	1.14	0.404121	212 / 350	0.930188	0.758504	1.14033	0.485791
Abbrevations: AN = anorexia nervosa, CI = confidence interval, OR = odds ratio/effect size from logistic regression, BMI = body mass index, ED = eating disorder, N = number of participants, P-value = p-value of regression coefficient, Pt = p value threshold, SCZ = schizophrenia, SE = standard error

## Sheet: ST 8 BMI PGS logistic SEED
Supplementary Table 8. Odds ratio (OR) per standard deviation schizohrenia (SCZ) polygenic score (PGS) on severe and enduring eating disorder in either full anorexia nervoisa + other eating disorder (ED), only anorexia nervosa (AN), or only anorexia nervosa restricting subtype (ANR) sample. Polygenic risk scores (PGSs) were generated from SNPs associated body mass index (BMI) at P-value threshold…
Model 1: Principal components 1-10, treatment region. Model 2: Same as model 1 and age. Model 3 (main model): Same as model 2, sex and eating disorder diagnosis. Model 4: Same as model 3 and BMI. Model 5: Same as model 4 and age at eating disorder diagnosis.
N - number of that in model 4 and 5 fewer individuals are included due to missing data on BMI and age at eating disorder onset.
Additional eating disorder diagnosis to anorexia nervosa (AN) was only included in the model when analysing the full dataset (N = 2,843).																													Additional eating disorder diagnosis to anorexia nervosa (AN) was only included in the model when analysing the full dataset (N = 2,843).																Additional eating disorder diagnosis to anorexia nervosa (AN) was only included in the model when analysing the full dataset (N = 2,843).
		Full sample with mixed eating disorder (ED) presentation					Sample with anorexia nervosa (AN) diagnosis					Sample with anorexia nervosa restricting (ANR) subtype					Sample with low-weight (BMI ≤ 17.5) anorexia nervosa
BMI PGS P-value threshold from the discrovery dataset	Models	N (SEED vs non-SEED)	OR	95%CI low	CI95% up	P-value	N (SEED vs non-SEED)	OR	95%CI low	CI95% up	P-value	N (SEED vs non-SEED)	OR	95%CI low	CI95% up	P-value	N (SEED vs non-SEED)	OR	95%CI low	CI95% up	P-value
Pt < 5e08	Model 1	528 / 806	1.12913	1.01164	1.26098	0.0305943	337 / 564	1.1437	0.99906	1.31042	0.0521083	178 / 331	1.14614	0.952526	1.38119	0.149439	229 / 374	1.22872	1.04281	1.45066	0.0143032
	Model 2	528 / 806	1.12743	1.00982	1.25947	0.033194	337 / 564	1.14491	0.999902	1.31218	0.0507112	178 / 331	1.15216	0.957212	1.38923	0.135361	229 / 374	1.22776	1.04152	1.45041	0.014994
	Model 3	528 / 806	1.1498	1.028	1.28696	0.0147959	337 / 564	1.15072	1.00441	1.31967	0.0435643	178 / 331	1.15622	0.960075	1.39499	0.127079	229 / 374	1.24014	1.05081	1.4669	0.0113138
	Model 4	528 / 806	1.13543	1.01432	1.27183	0.0276553	337 / 564	1.14834	1.00142	1.3181	0.0482166	178 / 331	1.17238	0.970257	1.41957	0.100752	229 / 374	1.25018	1.0583	1.48031	0.00899556
	Model 5	485 / 756	1.16277	1.03278	1.31016	0.0128899	316 / 535	1.16892	1.01275	1.35072	0.0334068	168 / 316	1.14702	0.942771	1.39795	0.171414	212 / 350	1.27236	1.06673	1.52193	0.00777979
Pt < 1e05	Model 1	528 / 806	1.1047	0.990133	1.23322	0.075206	337 / 564	1.11726	0.977308	1.2784	0.105202	178 / 331	1.11652	0.930617	1.34188	0.236944	229 / 374	1.1787	1.00298	1.38788	0.0468941
	Model 2	528 / 806	1.10393	0.989133	1.23274	0.0781312	337 / 564	1.12095	0.980287	1.28302	0.0959417	178 / 331	1.12273	0.93528	1.35027	0.215728	229 / 374	1.18341	1.00644	1.39432	0.0425616
	Model 3	528 / 806	1.12329	1.00467	1.25681	0.041688	337 / 564	1.12736	0.985577	1.29083	0.0812476	178 / 331	1.12708	0.938541	1.35615	0.201801	229 / 374	1.19094	1.0122	1.40421	0.0361058
	Model 4	528 / 806	1.10911	0.990631	1.24253	0.0729758	337 / 564	1.13197	0.985577	1.29763	0.0738579	178 / 331	1.14876	0.954322	1.38598	0.144401	229 / 374	1.20186	1.02019	1.41904	0.0287053
	Model 5	485 / 756	1.15396	1.02439	1.30121	0.0188467	316 / 535	1.16176	1.00736	1.3417	0.0400576	168 / 316	1.13418	0.934903	1.379	0.203225	212 / 350	1.25238	1.05124	1.49667	0.0123747
Pt < 0.001	Model 1	528 / 806	1.12748	1.01217	1.25675	0.0296681	337 / 564	1.13713	0.99726	1.298	0.0557108	178 / 331	1.0829	0.907112	1.2942	0.378777	229 / 374	1.18436	1.01188	1.3891	0.0360283
	Model 2	528 / 806	1.12579	1.01036	1.25523	0.0322169	337 / 564	1.14132	1.00069	1.30317	0.0495352	178 / 331	1.09341	0.915288	1.30801	0.325901	229 / 374	1.19144	1.01732	1.39847	0.030677
	Model 3	528 / 806	1.13958	1.02088	1.27304	0.0202423	337 / 564	1.14699	1.00535	1.31014	0.0421077	178 / 331	1.09939	0.919856	1.31589	0.298623	229 / 374	1.19875	1.02305	1.40788	0.0258037
	Model 4	528 / 806	1.12817	1.0095	1.26168	0.0338859	337 / 564	1.15627	1.01218	1.32249	0.0331149	178 / 331	1.12172	0.936533	1.346	0.213553	229 / 374	1.21203	1.03267	1.42607	0.0193323
	Model 5	485 / 756	1.1649	1.03738	1.30932	0.0101144	316 / 535	1.18796	1.03472	1.36591	0.0149258	168 / 316	1.11878	0.927651	1.3518	0.241587	212 / 350	1.24393	1.05231	1.47476	0.0110978
Pt < 0.01	Model 1	528 / 806	1.13606	1.02059	1.26548	0.0199888	337 / 564	1.14468	1.00472	1.30551	0.0428966	178 / 331	1.08432	0.908301	1.29583	0.370855	229 / 374	1.17096	0.9998	1.37403	0.0513169
	Model 2	528 / 806	1.13461	1.019	1.26423	0.0216042	337 / 564	1.1488	1.00805	1.31065	0.0381201	178 / 331	1.09139	0.913695	1.30541	0.33561	229 / 374	1.17623	1.0037	1.38125	0.0459464
	Model 3	528 / 806	1.15036	1.03126	1.28424	0.0122583	337 / 564	1.15622	1.01414	1.31974	0.0305787	178 / 331	1.09919	0.919693	1.31564	0.299477	229 / 374	1.18506	1.01047	1.39283	0.0377746
	Model 4	528 / 806	1.14379	1.02423	1.27829	0.0173927	337 / 564	1.17024	1.02521	1.33749	0.0203376	178 / 331	1.13285	0.945531	1.3601	0.177733	229 / 374	1.19501	1.01776	1.40639	0.0305626
	Model 5	485 / 756	1.17871	1.05041	1.32407	0.00533851	316 / 535	1.19156	1.03844	1.36932	0.0128964	168 / 316	1.12217	0.9296	1.35767	0.231826	212 / 350	1.23177	1.03987	1.46346	0.0166
Pt < 0.05	Model 1	528 / 806	1.1405	1.02424	1.27093	0.0168599	337 / 564	1.12866	0.990036	1.288	0.0710332	178 / 331	1.05093	0.877349	1.2599	0.589702	229 / 374	1.15702	0.984765	1.36203	0.0774468
	Model 2	528 / 806	1.1406	1.02405	1.27142	0.0170757	337 / 564	1.13334	0.993868	1.29378	0.0625269	178 / 331	1.05567	0.881035	1.26635	0.55744	229 / 374	1.16249	0.988845	1.36952	0.0694975
	Model 3	528 / 806	1.15297	1.03355	1.28729	0.0109796	337 / 564	1.13969	0.999084	1.30158	0.0523658	178 / 331	1.06381	0.887303	1.27701	0.504466	229 / 374	1.16994	0.99461	1.37918	0.0594062
	Model 4	528 / 806	1.14633	1.02632	1.28145	0.0158162	337 / 564	1.15367	1.00986	1.31963	0.0360083	178 / 331	1.09358	0.909971	1.31662	0.341396	229 / 374	1.17794	1.00058	1.38993	0.0504116
	Model 5	485 / 756	1.18708	1.05718	1.33451	0.00387655	316 / 535	1.18062	1.02771	1.35839	0.019495	168 / 316	1.09447	0.903043	1.32949	0.359123	212 / 350	1.23303	1.03636	1.47175	0.0190148
Pt < 0.1	Model 1	528 / 806	1.14898	1.03103	1.28155	0.0122605	337 / 564	1.12218	0.984112	1.28097	0.0861759	178 / 331	1.02374	0.854248	1.22751	0.799323	229 / 374	1.14182	0.971911	1.34394	0.108126
	Model 2	528 / 806	1.15005	1.03167	1.28316	0.0119372	337 / 564	1.12752	0.988461	1.28759	0.0748279	178 / 331	1.03002	0.859043	1.23597	0.749424	229 / 374	1.14779	0.976392	1.35203	0.0963789
	Model 3	528 / 806	1.15905	1.03816	1.29524	0.0088726	337 / 564	1.13242	0.992496	1.29358	0.06548	178 / 331	1.03711	0.864574	1.24513	0.694695	229 / 374	1.15325	0.980663	1.35903	0.0862143
	Model 4	528 / 806	1.15237	1.03076	1.28954	0.0129984	337 / 564	1.14632	1.00333	1.31137	0.0453461	178 / 331	1.06461	0.885659	1.28143	0.505494	229 / 374	1.15854	0.984683	1.36603	0.0775375
	Model 5	485 / 756	1.20456	1.07161	1.3558	0.00191052	316 / 535	1.17694	1.02396	1.35496	0.0224439	168 / 316	1.06786	0.881168	1.29641	0.504023	212 / 350	1.22416	1.02868	1.46153	0.0237306
Pt < 0.2	Model 1	528 / 806	1.14563	1.02673	1.27939	0.0153495	337 / 564	1.11157	0.973015	1.27109	0.120335	178 / 331	1.01841	0.848235	1.22331	0.844853	229 / 374	1.13123	0.960966	1.33397	0.139897
	Model 2	528 / 806	1.14712	1.02774	1.28148	0.0146859	337 / 564	1.11814	0.978374	1.27921	0.102142	178 / 331	1.02707	0.854846	1.23486	0.775368	229 / 374	1.13919	0.967035	1.34452	0.120519
	Model 3	528 / 806	1.15556	1.0337	1.29299	0.0112725	337 / 564	1.12399	0.983172	1.28636	0.087913	178 / 331	1.03456	0.860626	1.24461	0.717488	229 / 374	1.14559	0.972023	1.35275	0.106386
	Model 4	528 / 806	1.1518	1.02891	1.29058	0.0144137	337 / 564	1.14083	0.996478	1.30769	0.0571188	178 / 331	1.06236	0.881979	1.28131	0.524557	229 / 374	1.14927	0.974817	1.35765	0.0991398
	Model 5	485 / 756	1.20353	1.06937	1.35633	0.00223331	316 / 535	1.16705	1.01369	1.3457	0.0323557	168 / 316	1.06035	0.87384	1.28873	0.55339	212 / 350	1.21345	1.01828	1.45041	0.031734
Pt < 0.3	Model 1	528 / 806	1.15444	1.03415	1.28985	0.0107775	337 / 564	1.12227	0.981872	1.28404	0.0915535	178 / 331	1.02414	0.851274	1.23263	0.800172	229 / 374	1.13632	0.964889	1.34046	0.126951
	Model 2	528 / 806	1.15543	1.03473	1.29134	0.0105224	337 / 564	1.12883	0.987237	1.2921	0.077216	178 / 331	1.03312	0.85815	1.24453	0.73058	229 / 374	1.14426	0.970979	1.35091	0.109124
	Model 3	528 / 806	1.1627	1.0396	1.3016	0.00851187	337 / 564	1.13499	0.992303	1.29964	0.065524	178 / 331	1.04061	0.863975	1.25421	0.67483	229 / 374	1.15134	0.976471	1.3601	0.0949531
	Model 4	528 / 806	1.15848	1.03443	1.29862	0.0111771	337 / 564	1.15138	0.992303	1.32044	0.0425348	178 / 331	1.06661	0.88384	1.28871	0.501738	229 / 374	1.15494	0.979188	1.36491	0.0885809
	Model 5	485 / 756	1.21557	1.07948	1.37069	0.00134382	316 / 535	1.17967	1.02407	1.36108	0.0226368	168 / 316	1.06854	0.878661	1.30126	0.507138	212 / 350	1.22428	1.02682	1.46403	0.0250813
Pt < 0.4	Model 1	528 / 806	1.15918	1.03818	1.29545	0.00886506	337 / 564	1.12619	0.984983	1.28895	0.0829251	178 / 331	1.02286	0.849919	1.23147	0.810739	229 / 374	1.13564	0.963683	1.34053	0.13026
	Model 2	528 / 806	1.1606	1.03914	1.29743	0.00849512	337 / 564	1.13304	0.990581	1.2974	0.0692746	178 / 331	1.03174	0.856684	1.24327	0.741735	229 / 374	1.14316	0.969429	1.35048	0.113048
	Model 3	528 / 806	1.16756	1.04367	1.30742	0.00699192	337 / 564	1.1396	0.99594	1.30548	0.058105	178 / 331	1.0397	0.862807	1.25371	0.682318	229 / 374	1.15124	0.975652	1.36102	0.0966722
	Model 4	528 / 806	1.16295	1.03821	1.30393	0.00935989	337 / 564	1.15524	1.00825	1.32535	0.0383649	178 / 331	1.06482	0.882101	1.28693	0.513563	229 / 374	1.15454	0.97815	1.36543	0.0907322
	Model 5	485 / 756	1.21907	1.08227	1.37505	0.0011715	316 / 535	1.17887	1.02304	1.36057	0.0235025	168 / 316	1.06249	0.87327	1.29438	0.545016	212 / 350	1.2144	1.01785	1.45305	0.032121
Pt < 0.5	Model 1	528 / 806	1.1668	1.0447	1.30441	0.00641638	337 / 564	1.1321	0.990044	1.29592	0.070515	178 / 331	1.02738	0.853277	1.23759	0.775372	229 / 374	1.14693	0.972638	1.35489	0.104403
	Model 2	528 / 806	1.16796	1.04543	1.30609	0.00622091	337 / 564	1.13887	0.995564	1.30427	0.0588362	178 / 331	1.03592	0.859777	1.24895	0.71043	229 / 374	1.15425	0.978211	1.36457	0.0906424
	Model 3	528 / 806	1.17445	1.0495	1.3156	0.00524925	337 / 564	1.14512	1.00064	1.312	0.0496562	178 / 331	1.04363	0.865684	1.25908	0.654301	229 / 374	1.1622	0.984279	1.37503	0.0775036
	Model 4	528 / 806	1.17007	1.04424	1.31236	0.00701957	337 / 564	1.16075	1.01291	1.33192	0.0326326	178 / 331	1.06841	0.884612	1.29203	0.492555	229 / 374	1.16579	0.986982	1.37984	0.0722502
	Model 5	485 / 756	1.22277	1.08535	1.37951	0.00100225	316 / 535	1.18236	1.02605	1.36464	0.0211432	168 / 316	1.06651	0.876083	1.30006	0.521496	212 / 350	1.22321	1.02468	1.4645	0.026728
Pt < 1	Model 1	528 / 806	1.1695	1.04706	1.3075	0.00569242	337 / 564	1.13757	0.994837	1.30221	0.0602907	178 / 331	1.03054	0.855869	1.24146	0.750687	229 / 374	1.14966	0.975043	1.35804	0.0983871
	Model 2	528 / 806	1.17047	1.04761	1.30899	0.00556823	337 / 564	1.14414	1.00019	1.31034	0.0504204	178 / 331	1.03841	0.861822	1.25199	0.69174	229 / 374	1.15641	0.980149	1.36702	0.0863478
	Model 3	528 / 806	1.17802	1.05258	1.31974	0.00449263	337 / 564	1.15133	1.00606	1.3192	0.0412795	178 / 331	1.04696	0.868368	1.26325	0.63051	229 / 374	1.16531	0.986986	1.37868	0.0722921
	Model 4	528 / 806	1.17339	1.04709	1.31624	0.00610866	337 / 564	1.16675	1.01812	1.33891	0.0271298	178 / 331	1.07147	0.887044	1.2959	0.474314	229 / 374	1.16897	0.989747	1.38357	0.0672496
	Model 5	485 / 756	1.22809	1.08982	1.38586	0.000796105	316 / 535	1.18941	1.03201	1.37309	0.0171227	168 / 316	1.06916	0.877824	1.30396	0.506701	212 / 350	1.22585	1.02671	1.46801	0.0253114
Abbrevations: AN = anorexia nervosa, CI = confidence interval, OR = odds ratio/effect size from logistic regression, BMI = body mass index, ED = eating disorder, N = number of participants, P-value = p-value of regression coefficient, Pt = p value threshold, SCZ = schizophrenia, SE = standard error
